## Review Article

# Impaired muscle stem cell function and abnormal myogenesis in acquired myopathies

Alyson Deprez<sup>1,2</sup>, Zakaria Orfi<sup>1,2</sup>, Lupann Rieger<sup>1,2</sup> and Nicolas Alexandre Dumont<sup>2,3</sup>

<sup>1</sup>Department of Pharmacology and Physiology, Faculty of Medicine, Université de Montréal, Montreal, QC, Canada; <sup>2</sup>Centre Hospitalier Universitaire (CHU) Sainte-Justine Research Center, Montreal, QC, Canada; <sup>3</sup>School of Rehabilitation, Faculty of Medicine, Université de Montréal, Montreal, QC, Canada

**Correspondence:** Nicolas Alexandre Dumont (nicolas.dumont.1@umontreal.ca)

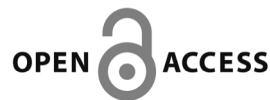

Skeletal muscle possesses a high plasticity and a remarkable regenerative capacity that relies mainly on muscle stem cells (MuSCs). Molecular and cellular components of the MuSC niche, such as immune cells, play key roles to coordinate MuSC function and to orchestrate muscle regeneration. An abnormal infiltration of immune cells and/or imbalance of pro- and anti-inflammatory cytokines could lead to MuSC dysfunctions that could have long lasting effects on muscle function. Different genetic variants were shown to cause muscular dystrophies that intrinsically compromise MuSC function and/or disturb their microenvironment leading to impaired muscle regeneration that contributes to disease progression. Alternatively, many acquired myopathies caused by comorbidities (e.g., cardiopulmonary or kidney diseases), chronic inflammation/infection, or side effects of different drugs can also perturb MuSC function and their microenvironment. The goal of this review is to comprehensively summarize the current knowledge on acquired myopathies and their impact on MuSC function. We further describe potential therapeutic strategies to restore MuSC regenerative capacity.

## Introduction

Skeletal muscles represent 35–45% of an adult body mass, and they are essential for vital functions such as locomotion, postural support, breathing, thermogenesis, and energy homeostasis. It is largely composed by post-mitotic multinucleated fibers that contains the actin-myosin filaments required for muscle contraction. A population of mononuclear cells, called muscle stem cells (MuSCs), or satellite cells, are located between the basal lamina and the sarcolemma of the muscle fibers [1]. During development, myogenic progenitor cells responsible of myofibers formation will give rise to this pool of quiescent MuSCs. These cells are the source of the remarkable regenerative capacity of the skeletal muscle tissue throughout life.

The formation of new muscle tissue (myogenesis) during muscle regeneration is a highly coordinated process regulated by different myogenic regulatory factors (MRFs). Under homeostatic conditions MuSCs are in a quiescent state and express the paired box protein 7 (PAX7), which is indispensable to promote MuSC survival in post-natal muscles [2,3]. After a stimulus such as mechanical stress or growth signals, MuSCs are activated and enter cell cycle to become myoblasts that express the myogenic markers PAX7, and/or myogenic factor 5 (MYF5), and/or myoblast determination protein 1 (MYOD1). After multiple rounds of cell division, myoblasts exit cell cycle to differentiate into myocytes. This differentiation process is accompanied by a reduction in PAX7 expression and an increase in myogenin (MYOG) and myogenic regulatory factor 4 (MRF4) expression. Differentiating myocytes express myomaker and myomerger (also called myomixer or minion) that work independently to regulate the different steps of cell fusion into multinucleated myofiber [4–7]. Myomaker regulates the membrane hemifusion, while myomerger is necessary for fusion pore formation [8]. A portion of these cells will resist differentiation and return to quiescence to maintain the pool of MuSCs for future injury through a complex intrinsic and extrinsic

Received: 12 October 2022  
Revised: 08 December 2022  
Accepted: 19 December 2022

Accepted Manuscript online:  
20 December 2022  
Version of Record published:  
06 January 2023

regulatory network, in which the Notch pathway plays a central role [9–12]. Activation of the Notch receptor on MuSCs by differentiated myoblasts or myofibers expressing the Delta-like (DLL) Notch ligands induces the expression of Hes/Hey family members that enhance Pax7 expression and inhibit MyoD and myogenin expression [13]. The expression of specific extracellular components in the MuSC niche, such as collagen-V, collagen-VI, and fibronectin, also provides a microenvironment that supports self-renewal and return to quiescence [14–16].

While MuSCs can restore the muscle structure and function in a matter of weeks to a few months after a severe muscle injury, their regenerative capacity can be diminished in many conditions. Genetic variants in different genes were shown to cause myopathies that impair MuSC function [17]. Mutations in genes such as *PAX7* or *MYMK* (Myomaker) induce primary satellite cell-opathies that affect directly MuSC function and myogenic capacity [18,19]. Mutations in other genes such as *LAMA2* (Laminin 211), *DMD* (dystrophin), or *LMNA* (Lamin A/C) cause secondary satellite cell-opathies that impair both the function of the MuSCs and the muscle fibers. For instance, in Duchenne muscular dystrophy (DMD), the mutation in the *DMD* gene prevents the expression of the dystrophin protein that plays an important role in muscle fiber stability, leading to chronic degeneration, inflammation, and fibrosis [20,21]. This detrimental environment sends conflicting signals that impair the regenerative capacity of MuSCs. The repeated cycles of degeneration and regeneration in DMD overactivate MuSCs, leading to telomere shortening that contributes to the reduction in the MuSC pool overtime [22]. Moreover, lack of dystrophin also directly affects MuSC function by reducing their ability to perform asymmetric cell division that generates self-renewing MuSCs and committed progenitors [23]. Overall, in dystrophic muscles, multiple intrinsic or extrinsic factors contribute to the decline in MuSC function, which impairs the regenerative capacity of the muscles [24–26].

In addition to genetic mutations, other conditions, such as aging, are also known to induce MuSC defects. A decrease in the MuSC pool and a reduction in their regenerative capacity post-injury is observed in aged skeletal muscle. Intrinsic factors such as cellular senescence (state of irreversible cell cycle arrest) was shown to contribute to this MuSC defect in aging [2]. Moreover, extrinsic factors such as chronic inflammation (inflammaging) or hormonal changes also contribute to the exhaustion of MuSC pool and the diminution of their myogenic capacity [27,28]. Notably, physical activity restores the ability of MuSCs to re-enter cell cycle and rejuvenates the regenerative capacity of old muscles [29].

Other conditions such as cancer cachexia can also affect MuSC function and impair their differentiation potential (reviewed in [30]). Paracrine factors secreted in the tumoral environment, such as CXCL1 (C-X-C motif chemokine ligand-1) [31] trigger the nuclear factor  $\kappa$ -B (NF- $\kappa$ B) pathway, which overstimulates Pax7 expression and blocks the expression of the myogenic factors required for myogenic differentiation [32]. Exosomes secreted by cancer cells also activates the Notch pathway that represses myogenic differentiation [33]. Reduction in the expression of ‘anti-inflammatory’ cytokines such as interleukin (IL)-4 and IL-13 in cancer-bearing mice, could also reduce Myomaker expression and impair myogenic differentiation, which can be restored by IL-4 administration [34].

The physiopathology of MuSCs in genetic myopathies, aging, and cancer has been thoroughly investigated in the field, through cellular, animal models, and clinical studies [17,23,30,35–37]. However, how MuSCs are affected in other conditions leading to acquired myopathies is still elusive. In this review, the alteration of MuSCs in respiratory, cardiac, kidney, inflammatory/infectious, and drug-related myopathies will be discussed.

## Respiratory, cardiac, kidney diseases, and myopathies

### Chronic obstructive pulmonary disorder

Chronic obstructive pulmonary disease (COPD) is a group of diseases that can be caused by different conditions such as tobacco smoking or refractory asthma leading to progressive breathing difficulties. This systemic pathology is characterised by increased inflammation of the airways, parenchyma, and pulmonary vasculature that can cause a low-grade systemic inflammation [38]. Dysfunctions in respiratory and limb muscles is a common manifestation of COPD that impact the quality of life of the patients [39]. Oxidative stress [40] and inflammatory state [41] were suggested as a potential causes of muscle weakness and reduction in exercise tolerance [42,43]. Oxidative stress is associated with elevated production of reactive oxygen species (ROS) that activate NF- $\kappa$ B signaling [44], which stimulates the expression of genes such as tumor necrosis factor- $\alpha$  (TNF- $\alpha$ ), IL-1 $\beta$ , and IL-6 that promote muscle atrophy in chronic diseases [45,46]. Moreover, NF- $\kappa$ B can directly bind to the promoter region of the muscle-specific ubiquitin ligases MuRF-1 (Muscle RING finger protein-1) and atrogin-1 to promote muscle atrophy [47].

In a mice model of inducible IL-13-driven pulmonary emphysema (IL-13<sup>TG</sup>), that mimics many of the features of COPD, it was shown that there is a reduction in the replication rate and in mRNA expression of *MyoD*, *Myf5*, and *Myh3* (embryonic myosin heavy chain) in MuSCs cultured *in vitro* [48]. Muscle injury induced by barium chloride injection in these mice results in impaired regeneration and smaller size of newly formed myofibers

[48]. MuSCs from IL-13<sup>TG</sup> mice show an increase in autophagosome accumulation that could be due to impaired autophagosome-lysosome fusion or acceleration of autophagosome generation [48]. Accumulation of autophagosomes has also been observed in muscle biopsies from COPD patients and is correlated with muscle atrophy [49,50]. Although the mechanism behind the accumulation of autophagosome is still elusive, it was shown that a treatment of IL-13<sup>TG</sup> mice with the autophagy-inducer spermidine rescued the replication rate and myogenesis capacity of MuSCs [48]. Using another transgenic mouse model of pulmonary inflammation induced by the overexpression of the *Tnf*-transgene under the surfactant protein C promoter, it was shown that increased circulating TNF- $\alpha$  levels stimulate local inflammation in the skeletal muscle resulting in muscle wasting and reduction in myoblast proliferation and differentiation in response to physical stress [51]. Consistently, administration of TNF- $\alpha$  in the medium of myoblasts cultured *in vitro* inhibited their differentiation capacity [51]. In human, the levels of proinflammatory cytokines such as TNF- $\alpha$  and IL-6 are increased in the serum of COPD patients and correlated with muscle wasting [52,53]; however, the expression of these cytokines at the RNA level in the skeletal muscle from COPD patients are similar to healthy individuals [54]. The systemic administration of these proinflammatory cytokines was shown to induce proteolysis and muscle atrophy in preclinical animal models [55,56], but there is no clear evidence of causality between proinflammatory cytokines and skeletal muscle defects in COPD patients.

Analysis of biopsies from the vastus lateralis muscle showed that the number of MuSCs is similar between healthy subjects and COPD patients [57,58]. However, the mRNA expression of *IGF1* (Insulin-like growth factor-1), *MYOD*, *MYF5* [59] and the protein expression of MYOD [54], MRF4 and MYOG [57] were significantly lower in the vastus lateralis muscle from COPD patients compared with healthy subjects. *In vitro* analysis of MuSCs collected from patients with COPD showed an increase in PAX7 and MYF5 protein expression while myosin heavy chain content was significantly lower during differentiation indicating a reduced ability to fuse and generate mature myotubes [57]. *In vitro* myoblasts from COPD patient showed an impaired capacity to fuse and smaller myotubes diameter compared with those from healthy subject [60]. The proportion of centro-nucleated regenerating fibers is increased in COPD patients that preserved their muscle mass [59], but it is similar to healthy subjects for COPD patients that experienced muscle wasting [57,58], suggesting that in absence of active signs of regeneration COPD patients cannot maintain their muscle mass leading to progressive muscle atrophy. The maintenance of skeletal muscle may be compromised in COPD due to an alteration of their differentiation capacity but also due to premature cellular senescence that can cause an exhaustion of the regenerative potential. *In vitro*, myoblasts from COPD patient exhibit a decrease in maximal telomere length compared with healthy subjects, which is correlated with the cross-sectional area of the thigh muscle [58]. Overall, impairment in MuSCs differentiation/fusion and skeletal muscle regenerative capacity in COPD contributes to the progression of muscle atrophy progression in this population (Figure 1). Adapted physical activity is beneficial for skeletal muscle of COPD patients by decreasing the mRNA and protein levels of myostatin, which is known to inhibit the cell cycle and the differentiation capacity of myogenic cells [61]. Moreover, exercise stimulates the expression of *IGF1* and *MYOD* [62]. IGF-1 is known to stimulate the expression of MRFs such as *MyoD* and *myogenin* and promote myogenic cell proliferation and differentiation [63–65]. Therefore, adapted physical activity in COPD patients could potentially rescue MuSC population and improved muscle regeneration.

## Heart failure

Chronic heart failure (CHF) is a systemic disease characterized by a progressive loss of the systemic perfusion capacity needed to respond to peripheral organs metabolic demands. Patients with CHF present a low-grade inflammation [66], disturbance in the renin–angiotensin system (RAS) [67], reduced exercise tolerance, and skeletal muscle wasting [68,69]. Muscle atrophy and a shift from slow resistant type I fibers to fast fatigable type II fibers [69] are strong predictors of frailty and poor prognosis in CHF individuals [70]. In CHF experimental models (ascending aortic stenosis [69] or monocrotaline intraperitoneal injection [71]), the expression of the myogenic factors *MyoD*, *Myf5*, and *Myogenin* are down-regulated in peripheral muscles with a reduction of muscle mass and cross-sectional area.

Imbalance in the RAS contributes to the pathogenesis of CHF. In addition to regulating blood pressure and cardiovascular function, the RAS can also regulate skeletal muscle and MuSC function. After a ligation of the left coronary artery in Sprague-Dawley rats, an increased level of angiotensin II, the main effector of the RAS, is responsible for the activation of caspase-3 and down-regulation of *IGF1* in skeletal muscles. These angiotensin II-mediated effects increase muscle proteolysis and apoptosis leading to muscle atrophy [72]. Angiotensin II mediates its effect via 2 receptors, the angiotensin II type I and type II receptors (AT1R and AT2R). After a cardiotoxin injury, in a mice model of CHF (ligation of the left anterior descending artery), MuSC pool and skeletal muscle regenerative capacity are decreased through an imbalance of AT1R and AT2R pathway, characterized by a strong reduction of AT2R expression [73]. A treatment with an antagonist of angiotensin II inhibited muscle wasting and restored the number of MuSCs

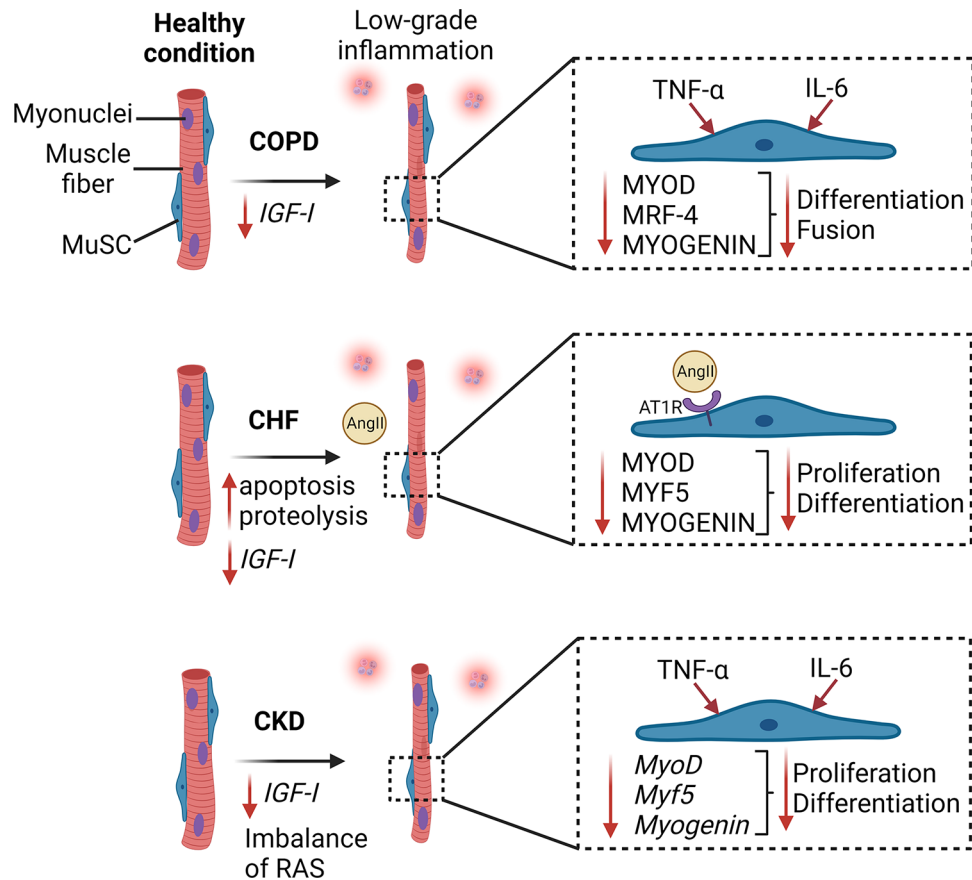

**Figure 1. Schematic overview showing the impact of cardiopulmonary and kidney diseases on MuSC function**

Chronic obstructive pulmonary disease (COPD) induces a decrease in IGF-1 levels in the muscle and a low-grade inflammation characterized by an increase of proinflammatory cytokines (TNF- $\alpha$  and IL-6). These alterations contribute to the decreased expression of MYOD, MRF-4 and MYOGENIN proteins that regulate MuSC activation, proliferation, and differentiation. In chronic heart failure (CHF), low grade inflammation is associated with higher apoptosis and proteolysis, decreased IGF-1 and increased angiotensin II protein levels in skeletal muscle. Angiotensin II acts through AT1 receptor to induce a decrease of MYOD, MYF5 and MYOGENIN in MuSCs. In chronic kidney disease (CKD), reduction of IGF-1 expression, imbalance of the renin-angiotensin system (RAS) and low-grade inflammation (e.g., TNF- $\alpha$  and IL-6) contribute to the reduced expression of *MyoD*, *Myf5*, and *Myog* genes in MuSC. In these three comorbidities, dysfunction of the MuSCs participates to muscle atrophy and weakness that contribute to the poor prognosis of the diseases.

in rodent model of CHF [74]. Infusion of Angiotensin II during muscle regeneration induced by cardiotoxin injury was shown to inhibit MuSC proliferation/differentiation by acting through the AT1R and Notch-dependent mechanism [74]. On the other hand, stimulation of AT2R activity with an agonist regulates positively MuSC differentiation and muscle regeneration [75]. The opposing effects of the two angiotensin II receptors have been well-described in different conditions [76,77]. AT2R was shown to antagonize AT1R signaling in part by their co-internalization and the inhibition of ERK (extracellular signal-regulated kinase) signaling [78]. To avoid conflicting signals between these signaling axes in MuSCs, there is a temporal regulation of angiotensin II receptors expression at the different stages of myogenesis. AT1R is predominantly expressed in quiescent/activating MuSCs, and AT2R is up-regulated in differentiating myoblasts [74,75].

*In vitro* culture of human myogenic cells isolated from patients with CHF showed that these cells are able to fuse and form myotubes that express similar levels of myosin heavy chain compared with healthy donors, which suggests that there are no intrinsic dysfunctions in MuSCs, and that it is rather systemic perturbations observed *in vivo*, such as RAS imbalance, that contributes to MuSC defects [79]. Administration of increasing doses of angiotensin II on myoblasts and myotubes *in vitro* were shown to increase the expression of myostatin and the ubiquitin ligases Murf-1 and atrogin-1 [80]. Treatment with the AT1R antagonist losartan ablated this effect. RAS inhibition is associated with



a lower prevalence of muscle wasting in CHF patients independently of established risk factors [81] and could be responsible for an alteration of MuSCs that contribute to muscle atrophy (Figure 1).

## Chronic kidney disease

Chronic kidney diseases (CKDs) are a group of diseases characterized by abnormalities in kidney structure or function, which can be caused by different conditions such as hypertension or diabetes. CKD are also associated with impairment of muscle protein synthesis leading to muscle atrophy [82]. Loss of muscle mass of the limbs in CKD is associated with an increased risk of mortality and morbidity [83]. Patients with CKD present impaired IGF-1 signaling, dysregulation of RAS, and systemic inflammation that participate to muscle wasting [72,84]. Similar to CHF, MuSC impairments can also contribute to muscle atrophy in CKD. In CKD experimental model (subtotal nephrectomy on C57BL/6 mice), the number of MuSCs is not affected in the gastrocnemius muscle, but mRNA expression of MRFs is decreased (*MyoD*, *Myf5*, *Myog*) [65]. *In vitro*, a reduction in proliferation and differentiation capacity was noted in MuSCs collected from CKD mice compared with control mice [65]. Cardiotoxin-injury in the tibialis anterior muscle leads to a delayed regeneration and smaller newly formed myofibers in CKD mice compared with control. The prolonged and excessive expression of proinflammatory cytokines (e.g., TNF- $\alpha$  and IL-6) in CKD muscle compared with controls during regeneration could contribute to this delayed regeneration [65] (Figure 1). The authors suggest that this degenerative microenvironment in CKD suppresses IGF-1 signaling in MuSCs, which could contribute to the impaired regenerative response. They showed that, similar to CKD mice, IGF-1 receptor knockout mice display muscle atrophy, increased *TGF $\beta$*  (transforming growth factor  $\beta$ ) expression and muscle fibrosis after muscle injury [65]. Similar to what was observed in COPD patients, the adapted physical activity is beneficial for skeletal muscles of CKD patients by improving the IGF-1 signaling and increasing *MyoD*, *Myog*, and *Myh3* mRNA expression [82].

## Inflammatory and infectious myopathies

In the skeletal muscle, there is a close interaction between MuSCs and the cellular components of the microenvironmental niche, such as fibro-adipogenic progenitors, blood vessels, and immune cells that collaborate in a well-orchestrated manner to restore a functional muscle tissue after injury [85,86]. Several studies have shown the importance of an organized inflammatory response during muscle injury, in which both innate and adaptive immune cells invade the muscle tissue to coordinate MuSC activation, proliferation, differentiation, and fusion [87–90].

After an injury, there is a release of damage-associated molecular patterns into the extracellular space and activation of the complement system, which trigger a rapid infiltration of the principal components of innate immune cells, such as neutrophils [91]. The activation of neutrophils is a fast process that occurs within minutes after an injury and last up to a few days post-injury [92]. Activated neutrophils clean necrotic cells and debris through phagocytosis in the injured site and amplify the inflammation response by releasing proteases, ROS, and proinflammatory cytokines such as TNF- $\alpha$ , IL-1 $\beta$ , and IL-8 [91–95]. Abnormal accumulation of neutrophils may cause collateral damage to the injured site and impaired the regeneration process [92,96].

After this first wave of immune cell infiltration, neutrophils are quickly replaced by macrophages and T cells. The macrophages are detected at the lesion 12–24 h after injury, and their number keeps increasing significantly during the first few days after injury concomitantly with the rapid decline of the number of neutrophils [87,97]. During the acute phase of regeneration, macrophages adopt a proinflammatory phenotype and play a crucial role in the clearance of cellular debris. Their secretion of several proinflammatory cytokines such as IL-6, TNF- $\alpha$ , and IL-1 $\beta$  contributes to the recruitment of T cells [93,98–100]. Both proinflammatory macrophages and T cells secrete high levels of proinflammatory cytokines that contribute to MuSC activation and proliferation [99,101,102].

After a few of days post-injury, pro-resolving macrophages become the predominant subpopulation in the regenerating muscle [103]. This phenotype switch is triggered by different mechanisms such as the phagocytosis of debris and apoptotic/necrotic cells, and the secretion of anti-inflammatory cytokines by neighboring cells such as regulatory T cells (Treg) [99]. Contrarily to proinflammatory macrophages, the pro-resolving macrophage subpopulation blocks MuSC proliferation and enhances their differentiation and their fusion into myotube [99].

Overall, the communication between the immune system and MuSCs play a central role during muscle regeneration. Controlled expression of proinflammatory and anti-inflammatory cytokines in a timely manner is essential to guide MuSCs through myogenesis after acute injury. Alternatively, dysregulation of the immune system and the

chronic expression of proinflammatory signals can directly impact MuSC function and impair the regeneration process, as it is observed in degenerative genetic myopathies such as DMD [104]. In this section, we discuss how autoimmune myopathies or various types of infectious myositis can dysregulate the immune system and impair MuSC function and muscle regeneration.

## Idiopathic inflammatory myopathies

Idiopathic inflammatory myopathies (IIMs) are a spectrum of systemic autoimmune diseases mainly characterised by muscle weakness, elevated levels of serum muscle enzymes, auto-antibodies, and frequently accompanied by extra-muscular manifestations that affect either skin, lung, or joints [105]. The current classification of IIMs suggests the following subgroups: polymyositis, dermatomyositis, immune-mediated necrotising myopathy (IMNM), sporadic inclusion-body myositis (sIBM), clinically amyopathic dermatomyositis, and anti-synthetase syndrome [106–109]. Although these subgroups have overlapping clinical features, the widespread variation in the clinical manifestations of IIMs suggests different pathophysiological mechanisms. Specific human leukocyte antigen haplotypes are among the genetic risk factors for IIMs development [110]. Analysis of high throughput sequencing datasets has identified differentially expressed genes and dysregulated immune-related pathways that highlight the underlying mechanisms of IIMs [111,112]. Several proinflammatory micro-RNAs are up-regulated in IIMs and could contribute to the pathogenesis [113,114]. These different inflammatory signals lead to the chronic and uncontrolled accumulation of immune cells such as CD8+ (cluster of differentiation 8) T cells [115], monocytes [116], and neutrophils [117] that contributes to disease severity. Consequently, the treatment of IIMs is still largely based on anti-inflammatory drugs such as glucocorticoids, antimalarial agents, and immunosuppressive drugs.

The impact of IIMs on skeletal muscle structure and function is well-characterized; however, their effect on muscle regeneration is still elusive. A study comparing the expression of MRFs from muscle biopsies of patients with polymyositis, dermatomyositis, and sIBM showed that there is an increase expression of Pax7, MyoD, Myogenin, and neonatal myosin heavy chain compared with healthy controls. These findings indicate active regeneration in the muscles of IIMs [118]. The next paragraphs describe the current evidence regarding the impact of different IIMs on MuSC function (Figure 2).

## Polymyositis

Polymyositis is a subgroup of IIMs, characterized by proximal weakness and mild diffuse muscular pain. The histopathological characteristics of polymyositis are mononuclear inflammatory cell infiltration, mainly the CD8+ cytotoxic T cells and CD4+ T cells [119]. Using an *in vitro* model of polymyositis (co-culture of CD8+ T cells with C2C12 myotubes transduced retrovirally with the genes encoding major histocompatibility complex (MHC) class I and a peptide derived from ovalbumin), it was shown that CD8+ T cells invade myotubes and contribute to muscle damage [115].

Analysis of muscle biopsies from polymyositis patients showed that CD8+ T cells are the principal source of necrotic myofibers throughout the expression of cytotoxic effector molecules including perforin 1 and granzyme B [120,121]. Although CD8+ T cells are the predominant immune cells in polymyositis associated with cytotoxicity, it was shown that CD4+ T cells can also cause muscle cell injury directly through Fas cell surface death receptor and its ligand FasL (transmembrane proteins that belong to the TNF family) that are expressed on both infiltrating lymphocytes and muscle fibers on muscle tissue from polymyositis patients [119]. Recently, it was shown in polymyositis patients that the necrosis of muscle fibers is mainly caused by Fas ligand-dependent necroptosis pathway, while MuSC/myoblast apoptosis is triggered by perforin1 and granzyme B [122]. Consequently, the administration of a pan-caspase inhibitor reduced MuSC/myoblast apoptosis but did not affect myotube cell death *in vitro*. Alternatively, the administration of a necroptosis inhibitor (necrostatin-1s) reduced myotube necrosis but did not reduce MuSC/myoblast cell death *in vitro* [122]. Notably, the administration of necrostatin-1s in a murine model of polymyositis did not only reduced myofiber necroptosis but also MuSCs apoptosis (Figure 2) [122]. These results suggest that the reduction of the proinflammatory cytokines and enzymes secreted by necrotic cells and T cells can restore MuSCs function in polymyositis.

## Dermatomyositis

Dermatomyositis is the most common subtype of IIMs, represented by ~40% of the total cases. It is characterized by predominant proximal muscle weakness combined with skin rash signs [123]. The histopathological features of dermatomyositis muscle biopsies are characterized by peri-vascular infiltration of immune cells, but less prominent necrosis [124]. Unlike polymyositis, in which CD8+ T cells are the predominant infiltrating immune cells [122], dermatomyositis muscle biopsy is mainly invaded by B cells, macrophages, dendritic cells and CD4+ T cells [125].

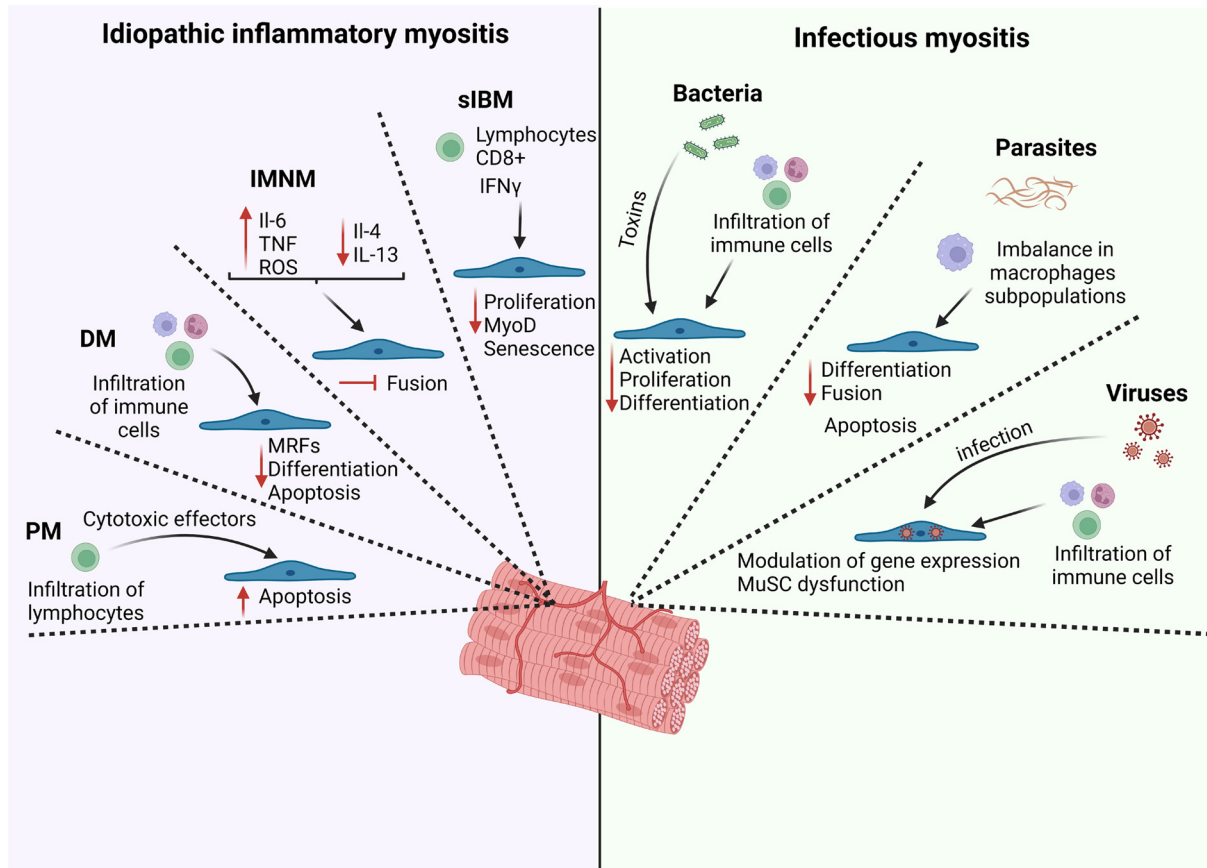

**Figure 2. Schematic overview showing the main effects of inflammatory and infectious myopathies on MuSC function**

Idiopathic inflammatory myositis is characterized by an infiltration of immune cells and/or imbalance of pro- and anti-inflammatory cytokines impairing MuSC function. In both dermatomyositis (DM) and polymyositis (PM) diseases there is an increase in MuSC apoptosis mediated through the excessive accumulation of immune cells. In immune-mediated necrotizing myopathy (IMNM), the MuSC fusion is inhibited due to an imbalance in pro- and anti-inflammatory cytokines. In sporadic inclusion-body myositis (sIBM), paracrine signals from lymphocytes contribute to the reduction in MuSC proliferation and MyoD expression, alongside with MuSC senescence. Infectious myositis are divided in three main causative agents: bacteria, parasites, and viruses. Bacterial infection induces the infiltration of immune cells and/or the secretion of toxins that decrease the activation, proliferation, and differentiation capacity of MuSCs. Parasite infection is characterized by an imbalance of macrophages subpopulation that leads to MuSC apoptosis and lower differentiation and fusion capacity. In viral infection, the infiltration of immune cells and the infection of MuSCs by the viruses modulate the gene expression profile of MuSCs leading to their dysfunction.

Moreover, atrophied myofibers from muscle biopsies of dermatomyositis patients are found in a patchy distribution at specific regions of the fascicle named perifascicular atrophy [124]. These myofibers are characterized by the overexpression of specific proteins around the perifascicular regions, including type I interferon (IFN-I)-induced protein [126], that play a role in the pathophysiology of dermatomyositis [127]. Analysis of muscle biopsies from dermatomyositis patients showed that in the advanced stage of perifascicular atrophy there is a perturbation of MRFs expression, characterized by an increase in Pax7 and Myogenin, but not MyoD [128]. Recently, a study showed that MuSCs isolated from muscle biopsies of patients with dermatomyositis have reduced proliferation and differentiation compared with healthy controls [129]. These cells exhibit higher levels of senescence markers that could partly explain their proliferative defects (Figure 2). Considering that dermatomyositis is associated with sustained inflammation characterized by high levels of IFN-I [126], the authors performed loss- and gain-of-function experiments to demonstrate that high levels of IFN-I decrease the proliferation of MuSCs, while pharmacological inhibition of IFN signaling rescued the proliferation of MuSCs from dermatomyositis patients [129]. These findings suggest that the detrimental effect of dermatomyositis in MuSC function is mediated, at least in part, by paracrine factors.

### Immune-mediated necrotising myopathy

IMNM is the second largest subtype of IIMs representing ~20% of the total cases. It is characterized by a severe proximal muscle weakness, low levels of inflammatory cell infiltrate, myofiber necrosis, elevated serum creatine kinase, and limited signs of extra-muscular disease activity [130,131]. Three subtypes of IMNMs are distinguished. Two of them have autoantibodies against signal recognition particle (SRP) or anti-3-hydroxy-3-methylglutaryl-CoA reductase (HMGCR). The third group is a seronegative subtype, in which these autoantibodies cannot be identified [131]. *In vitro*, it was shown that anti-SRP and anti-HMGCR antibodies stimulate myotube atrophy and activation of the ubiquitin E3 ligases MuRF-1 and Atrogin-1 from human muscle biopsies [130]. The fusion of myoblasts into myotubes was also impaired by the treatment with these antibodies (Figure 2). The administration of anti-SRP and anti-HMGCR antibodies is linked to an increased production of proinflammatory molecules (IL-6, TNF and ROS) and a decrease in the expression of anti-inflammatory cytokines (IL-4 and IL-13). Exogenous administration of IL-4 or IL-13 partially rescue the defects in myotubes size induced by anti-SRP and anti-HMGCR antibodies [130].

### Sporadic inclusion body myositis

sIBM is complex disease caused by an autoimmune component and by degenerative changes characterized by the accumulation of protein aggregates called inclusion bodies [132]. sIBM patients display a slowly progressive muscle atrophy and weakness, signs of fiber damage, and inflammatory infiltrates (mainly cytotoxic CD8+ T cells) with increased IFN $\gamma$  signature [133,134]. Comparison of MRFs expression from muscle biopsies of patients with different IIMs showed that there is a lower level of MyoD and neonatal myosin heavy chain in sIBM compared with polymyositis [118]. *In vitro* culture of MuSCs isolated from sIBM patients showed that their proliferation is impaired, and the doubling time is longer than normal age-matched controls [135]. However, myoblast differentiation is not impaired *in vitro*. Signs of premature senescence (telomere shortening) and accumulation of cytoplasmic inclusion bodies are also observed in sIBM myoblasts *in vitro*, suggesting intrinsic defects. Recently, a study comparing muscle regeneration in sIBM patients submitted to 12 weeks low-load blood-flow restricted resistance training versus non-exercising sIBM controls, showed that MuSCs content, proliferation, myonuclei number, and myofiber size were not different between groups [136]. This unexpected lack of MuSC response that is usually observed after exercise training suggests that MuSCs are less reactive to growth stimulus or injuries in sIBM (Figure 2).

### Infectious myositis

Infectious myositis is a group of inflammatory myopathies, that is caused by a wide range of micro-organisms including bacterial, parasitic, and viral pathogens [137]. Recently, the various pathogens causing infective myositis and their related clinical features have been comprehensively summarized [138]. Patients diagnosed with infectious myositis may display muscle pain, tenderness, swelling, and weakness. The diagnosis is based on the clinical findings added to laboratory testing, which could be combined to the muscle biopsy findings [138]. The treatments for infectious myopathies depend on the infectious agent. In the next section, we will focus on infectious agents (bacteria, parasites, and viruses) that might impair MuSC function either directly through pathogen–MuSC interaction, or indirectly through the disruption of the immune response.

### Bacterial infection

The skin protects against bacterial infections by limiting the interaction between the internal and external environment of skeletal muscle. However, bacteria could invade skeletal muscle due to a traumatic injury or to a non-aseptic surgery [138]. Bacterial infection can cause sepsis, a severe inflammatory response, which has been shown to induce muscle atrophy and impair muscle regeneration [139,140]. Single cell RNA sequencing on skeletal muscle in a model of faecal-induced sepsis was shown to induce a rapid immune response and a depletion in the MuSC population that remains at long-term (1-month post-sepsis) [141]. In another model of caecal ligation and puncture, it was shown that sepsis affects MuSC response and their mitochondrial metabolism, leading to impaired muscle regeneration post-injury [139]. *In vitro* experiments showed that the administration of blood serum from septic mice impair MuSC proliferation compared with serum from non-septic mice, suggesting that systemic paracrine factors contribute to MuSC defects induced by sepsis [139] (Figure 2). Various subgroups of pathogenic bacteria, such as gram-positive/gram-negative bacteria, and mycobacteria, can lead to myositis that can affect MuSC function [138].

Pyomyositis is an acute inflammation caused by bacterial infection, which is characterized by neutrophil infiltration into the muscle tissue [142]. Although pyomyositis was commonly observed in the tropical regions, many cases have been detected in temperate regions as well, due to the increase in travel movement [143]. Approximately 90% of pyomyositis cases are caused by *Staphylococcus aureus* (gram-positive), and the other 10% are caused by



either *Streptococcus pyogenes* (gram-positive), *pneumococci* (gram-positive), *Salmonella* (gram-negative), or *Escherichia coli* (gram-negative) [144–146]. A study conducted on broiler chicks showed that oral infection of young chicken with *Salmonella Enteritidis* causes systemic infection, and the bacteria could spread out into the muscle tissues [147]. The authors have shown that infected animals have smaller muscle fiber size. Moreover, there is a reduction in the number of nuclei per fiber, which suggest impaired MuSC activity and reduced nuclear accretion to the myofibers. The authors hypothesize bacterial cell wall components (polysaccharides) could directly interact with the Toll-like receptors expressed by MuSCs. Alternatively, an up-regulation in systemic pro-inflammatory cytokines could also impair MuSC myogenic progression.

Myobacteria are another group of bacteria that can affect MuSCs. Particularly, Buruli ulcer is a chronic bacterial infection caused by *Mycobacterium Ulcerans*. While this mycobacterium affects principally the skin, it can also target skeletal muscle to cause weakness. The muscle biopsy following infection is characterized by myofiber atrophy, edema, and the accumulation of connective tissue [138,148]. Muscle histology shows interstitial macrophages and CD4+ T cells around the blood vessels accompanied by myopathic changes. Injection of *M. ulcerans* in the right biceps muscle induces myonecrosis, reduces the size of the myofibers, and the maximal force of the proximate-infected muscles compared with the control mice [148]. *M. Ulcerans* induces its detrimental effect via the release of a toxin called mycolactone. Notably, *M. Ulcerans* or mycolactone administration induces inflammation and myonecrosis, but fails to activate MuSCs, as shown by the absence of upregulation of the MRFs Pax7, MyoD, and Myogenin post-infection [148,149]. The impaired MuSC response could contribute to the delayed regeneration and the accumulation of fibrotic tissue following *M. ulcerans* infection.

### Parasitic infections

Several parasites can be associated with myositis, such as *Trypanosoma cruzi*, *Toxocara canis*, *Schistosoma*, *Echinococcus*, *Entamoeba histolytica*, *sarcocystis*, and others. However, the effect of these parasites on MuSC function has been overlooked. Only *Toxoplasma gondii* (causing Toxoplasmosis), and *Trichinella spiralis* or *pseudospiralis* (causing trichinosis) have been reported to be directly involved in MuSC impairment [138,150] (Figure 2). Each parasite has its unique mode of infection, which triggers a different immune response in the muscle tissue [138].

Toxoplasmosis is a parasitic infectious disease caused by the ingestion of food contaminated with *Toxoplasma gondii*. Although most patients remain asymptomatic, the immunocompromised patients might have severe symptoms. The muscle involvement is characterized by signs of myalgia, weakness, and muscle wasting. Different studies showed that infection with *T. gondii* has a negative impact on both immune cells and MuSCs [151,152]. A first study in mice showed that *T. gondii* induces myofiber necrosis and reduction in muscle strength [152]. The infection leads to the chronic persistence of a proinflammatory state and an impaired capacity of macrophages to adopt a pro-resolving phenotype. Deletion of Treg in the infected mice restores the capacity of macrophages to switch to their pro-resolving state, which was associated with increased signs of muscle regeneration [152]. Cardiotoxin injury to *T. gondii* infected mice leads to reduced MuSC proliferation and exhaustion of the MuSCs pool, which was associated with impaired muscle regeneration (reduced myofiber size) [151]. Single cell RNA sequencing of the infected or uninfected muscle injured or not with cardiotoxin showed that a large proportion of macrophages remains in the inflammatory state post-injury, which is associated with a reduction in the pro-regenerative macrophage subpopulation [151]. Another group has studied the direct effect of *T. gondii* on myoblasts *in vitro* by infecting C2C12 myoblasts with *T. gondii* [153]. Myogenic markers such as MyoD and Myogenin were reduced a few days after the infection. A reduction in myoblast differentiation, fusion, and myotube growth was also observed. These changes were not associated with an increase in cell necrosis or apoptosis. Infected cells also secrete higher levels of pro-inflammatory cytokines such as IL-6 and MCP-1 (monocyte chemoattractant protein-1), and the conditioned medium from infected cells reduces the differentiation of non-infected cells [153]. Overall, *T. gondii* infection impairs MuSC regenerative capacity by targeting MuSCs directly and indirectly through the perturbation of the immune response.

Myositis can be triggered by infection with another type of parasite, the *Trichinella spiralis*. After the intestinal phase, adult worms release newborn larvae into the lymphatic system, which invade the skeletal muscle tissue where they develop and encyst. Muscle invasion causes fever, myalgia, swelling, and muscle weakness. The regenerative capacity of skeletal muscle is severely impeded during *Trichinella* infection, which is linked to mis-differentiation of the MuSCs [154–156]. The larvae invade the myofiber causing the destruction of the myofibrillar organization. Consequently, the MuSCs are activated and proliferate, but they do not fuse to form new myofibers. Instead, they contribute to the development of a specific structure called the nurse cell inside the infected myofiber, which protects the parasite [157]. Transcriptomics analysis of human infected muscle revealed dysregulated expression of genes related to myogenesis, cell proliferation, differentiation, and apoptosis [158,159]. Further analysis revealed that during early infection there is an enrichment in apoptosis-inducing factor-mediated signaling, while only the anti-apoptotic

factors survivin and Bcl-2 (B cell lymphoma-2) remains after nurse cell formation [160]. The classical therapy for trichinosis is based on anti-helminthic drugs (e.g., albendazole and mebendazole). It was also showed that mice immunized with gamma-irradiated *Trichinella spiralis* larvae are protected against infection, which leads to reduced muscle damage, Myogenin and Bcl-2 expression [161].

## Viral infections

There is wide variety of viruses that can cause myositis and different reviews have summarized their main pathological features [138,150,162,163]. Among the viruses known to cause myositis, influenza viruses, coronaviruses, and arboviruses can also impair MuSC function either by directly targeting these cells or indirectly through their impact on the immune system (Figure 2).

Influenza A and B viruses can cause muscle weakness accompanied by fever, pneumonia, and acute respiratory distress syndrome [164]. The exact mechanism of influenza-associated myositis is not yet well described; however, influenza has been isolated from muscle tissues in some cases, suggesting that direct viral invasion into the muscle fibers could contribute to the pathogenesis [165]. *In vitro* experiments showed that influenza A viruses can infect human myotubes and lead to cytotoxic effects; however, myoblasts were partially protected from infection [166]. Influenza infection also results in the systemic release of proinflammatory cytokines such as IL-6, which activates the expression of the ubiquitin E3 ligase Atrogin-1 that promotes muscle atrophy [167]. In the acute phase after the infection, there is an accumulation of macrophages in the skeletal muscle tissue, which is followed by the activation and proliferation of the MuSCs in young mice [167]. However, in aged mice infected with influenza, the macrophage response is blunted, which impairs the expansion of the MuSCs pool [168]. Altogether, these results suggest that influenza infection affects MuSCs indirectly by modulating the immune response.

Severe acute respiratory syndrome coronavirus 2 (SARS-Cov-2) is widely known to induce a variety of symptoms, including myalgia and myositis. SARS-Cov-2 infection can trigger a cytokine-storm characterized by the excessive release of pro-inflammatory cytokines such as IL-1 $\beta$ , IL-6, and TNF- $\alpha$ , which can perturb MuSC function. The infection also increases the expression of ceramides, which are bioactive lipids that can negatively affect myogenesis [169]. SARS-Cov-2 relies on the expression of angiotensin-converting enzyme 2 (ACE2) to invade the host cells. Noteworthy, single cell transcriptomics analysis suggest that ACE2 is expressed in small specific subsets of MuSCs [170]. However, the direct impact of this coronavirus on MuSCs is still unknown.

Arboviruses are a group of viruses (e.g., dengue virus, West Nile virus, Zika virus, Ross River virus, Chikungunya virus, Mayaro virus, and Sindbis virus) transmitted by arthropods, which can cause fever, rash, polyarthritits, encephalopathy, and myalgia/myositis. Two possible pathophysiological mechanisms of arbovirus-associated myopathies have been described [171]. Like other type of viral infection, the first mechanism is linked to the activation of the inflammatory/immune pathways. Using a murine model infected with alphaviruses (Ross River virus), it was shown that the secretome of macrophages contributes to the development of myositis, and treatment of mice with immunosuppressive drugs prior to infection reduces muscle damage without significantly affecting the viral load in organs [172]. Another study showed that infection with Ross River virus leads to the production of macrophage migration inhibitory factor (MIF), which is associated with muscle damage, and that MIF-deficient mice are protected against muscle degeneration despite having similar viral titers [173]. Similarly, the mannose binding lectin pathway, a pattern recognition molecule of the innate immune response, is stimulated after Ross River virus infection, and mice deficient in this pathway are protected against muscle damage without changes in the viral load [174]. The second pathogenic mechanism is linked to the direct infection of MuSCs and myoblasts by arboviruses. Inoculation of Chikungunya virus to human myogenic cells *in vitro* was shown to infect myoblasts but not myotubes. Moreover, immunohistochemistry studies on muscle biopsies from two infected patients revealed that MuSCs were selectively infected by Chikungunya virus, while myofibers were not [175]. Transcriptomic analysis on non-infected versus Chikungunya virus-infected myoblasts have shown altered expression of genes involved in muscular-associated disorders, innate immune responses, cellular growth and death, host metabolism, and virus replication [176]. Similarly, it was demonstrated *in vitro* that human myoblasts could be infected by Zika virus, whereas myotubes are resistant to infection [177,178]. Zika-virus infected myogenic cells undergo a profound modulation of gene expression related to cytokine production, cell death, and immune response [179]. Furthermore, viral replication can also occur within muscle following infection with Ross River virus, Chikungunya virus, Mayaro virus, and Zika virus [171]. Altogether, these findings indicate that viruses can cause MuSC dysfunctions directly through virus cytotoxic effect of infected MuSCs, or indirectly through the perturbation of the inflammatory system response, which in turn has a negative impact on muscle growth and regeneration.

## Toxic myopathies

Many drugs used to treat different diseases or conditions have numerous side effects that can affect skeletal muscle mass or function. These drug-induced myopathies can induce symptoms such as muscle weakness, myalgia, fatigue, and elevation in blood creatine kinase levels [180]. These drugs can also affect the function of MuSCs and muscle regeneration. In this section, we focus on the effect of large classes of drugs such as glucocorticoids and statins, as well as other medications causing toxic myopathies (colchicine, chloroquine, and metformin).

### Glucocorticoids

Glucocorticoids are potent anti-inflammatory molecules that are used for the treatment of various immune-related diseases such as arthritis, allergic reaction, breathing disorders, skin conditions, eyes problem, and muscular dystrophies [181,182]. However, the administration of natural or synthetic glucocorticoids is associated with harmful side effects, such as osteoporosis, cataracts, myalgia and muscle weakness. In skeletal muscle, glucocorticoids activate the members of the ubiquitin-proteasome system, Murf-1 and Atrogin-1, which are associated with muscle protein degradation and atrophy [183]. Moreover, glucocorticoids can also directly target MuSCs and impair myogenesis. Dexamethasone, a synthetic glucocorticoid, was shown to reduce the proliferation and differentiation of myogenic cells *in vitro* [184,185]. Dexamethasone administration in pregnant rat affect the fetal muscle development, leading to reduced myofiber size, MuSC pool, and myogenin expression [186]. Administration of high dose of dexamethasone after muscle injury in adult mice was also shown to impair muscle regeneration and promote heterotopic ossification [187]. Another study showed that it reduces myogenic cell proliferation and the size of the newly formed myofibers [184]. This effect is at least partially mediated by an increase in the expression of myostatin, which reduces the expression of the pro-myogenic gene Akirin 1 and the expression of MyoD, Myf5 and Myogenin. The down-regulation in these MRFs prevents the activation of MuSCs and contributes to muscle atrophy [184]. Additionally, myostatin is known to increase the activity of p21 which inhibits CDK2 (cyclin dependent kinase-2) and prevents the progression of MuSCs from G1 to S phases thus leaving them in a quiescent state [188]. Moreover, activation of the ubiquitin-proteasome system by dexamethasone was also demonstrated to induce the degradation of MyoD in differentiated myotubes [189].

Other types of glucocorticoids also showed similar impact on MuSCs function. Treatment of porcine MuSCs with cortisol increases cytochrome c expression, a major effector in apoptosis, and reduces cell viability [190]. Administration of budesonide, a second-generation glucocorticoid, *in vitro* was shown to reduce Pax7 and MyoD expression and induce a spontaneous differentiation of myoblast cultured in growth medium [191]. Treatment with prednisone on myoblasts *in vitro* reduces cell proliferation and the number of myogenic cells expressing Pax7 or Myogenin [104]. Single myofibers isolated from prednisolone-treated mice show a decrease in the expression of eNOS (endothelial nitric oxide synthase) and nNOS (neuronal nitric oxide synthase) in MuSCs. This decrease in nitric oxide is accompanied by a reduction in the number of MyoD positive cells, which can be rescued by the supplementation of a nitric oxide donor in the culture media [192] (Figure 3).

*In vivo*, the effect of glucocorticoids on muscle regeneration depends on the dosing and timing. Daily administration of prednisone or deflazacort during muscle regeneration of wild-type mice reduces the extent of muscle damage at 7 days post-cardiotoxin injury, but it impairs the recovery of muscle force and physical function at 14 days. At the opposite, weekly administration of these glucocorticoids accelerates the recovery of muscle function [193]. In models of chronic muscle degeneration, such as DMD, the daily or weekly administration of prednisone reduces the excessive inflammation without affecting the number of myogenic cells [104]. Altogether, these findings indicate that glucocorticoids impair the function of MuSCs during acute muscle regeneration, and that the use of these drugs should be controlled and restricted to specific chronic degenerative conditions.

### Statins

Statins are a class of drugs widely used to reduce blood cholesterol levels and are often used in the treatment of atherosclerosis and the prevention of cardiovascular diseases. Muscle pain, fatigue, and weakness are common side effects of the use of statins [194]. These detrimental side effects could be mediated by different mechanisms such as the overexpression of Atrogin-1 and/or mitochondrial dysfunctions [195,196]. In addition, statins can directly impair MuSC function and myogenesis. *In vivo*, treatment of diabetic mice with Fluvastatin decreases the regenerative capacity after cardiotoxin injury, resulting in smaller newly formed myofibers [197]. Similarly, simvastatin decreases the proliferation and differentiation of myogenic cells through the activation of several cellular pathways [198]. Simvastatin inhibits the expression of PTGS1 (prostaglandin-endoperoxide synthase 1) which is an enzyme that biosynthesizes prostaglandins from arachidonic acid. Prostaglandins, such as PGE2 (prostaglandin-E2), contribute to MuSCs

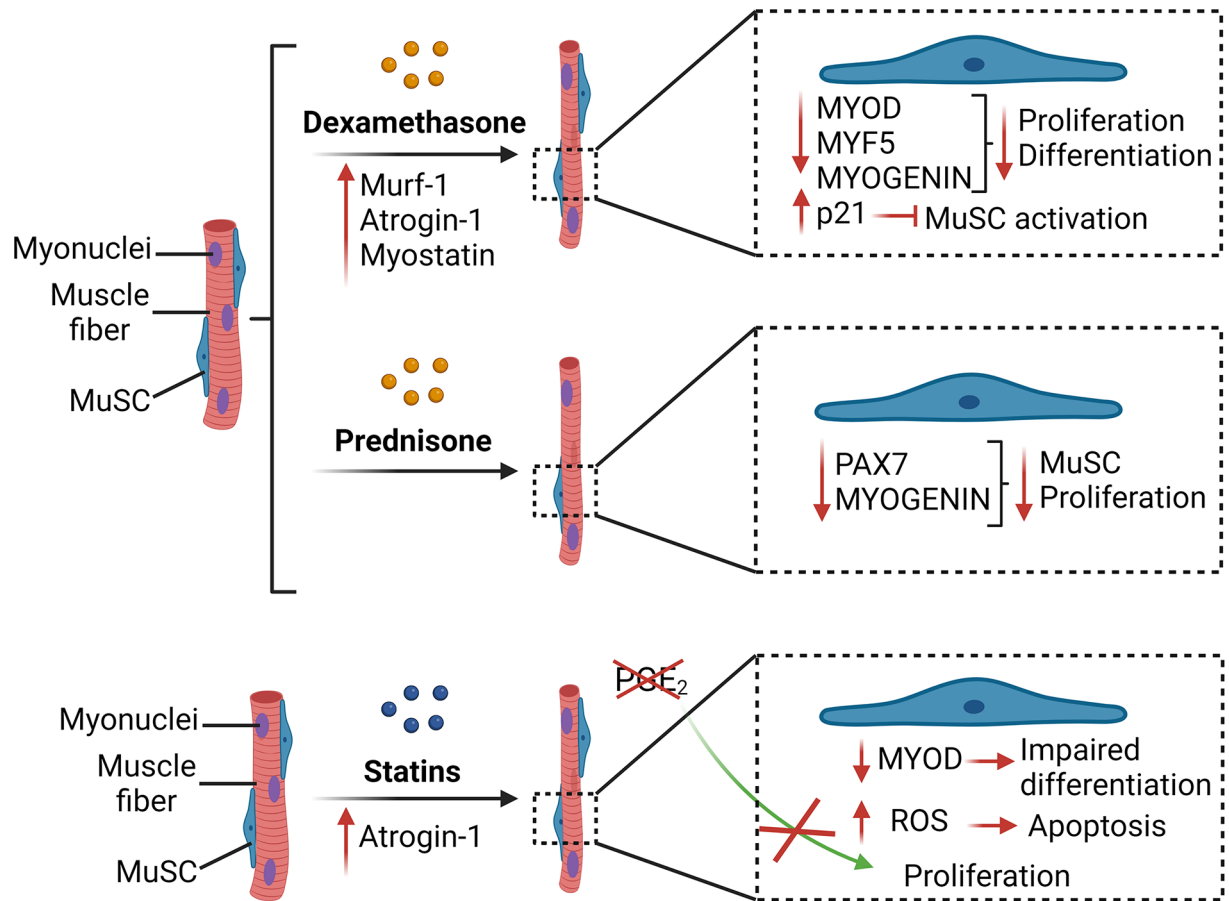

**Figure 3. Schematic overview showing the impact of drug-induced myopathies on MuSC function**

Dexamethasone (glucocorticoid) is associated with an increase in atrophic markers (Murf-1, atrogin-1 and myostatin), a decrease in the expression of MYOD, MYF5 and MYOGENIN, and an increase in the expression of the cell cycle inhibitor p21 that inhibits the activation of MuSCs. Prednisone (glucocorticoid) is associated with a reduction in the expression of PAX7 and MYOGENIN in MuSCs. Statins induce an increase in Atrogin-1 expression and a reduction of PGE<sub>2</sub> levels in the muscle, which impair MuSC proliferation. Statins also directly target MuSCs to induce a decrease in MYOD expression and stimulate apoptosis through the release of ROS.

proliferation and muscle regeneration [199]. Treatment with specific eicosanoids can partially rescue differentiation in statin-treated myoblasts [198]. Impaired myoblast differentiation by simvastatin was also shown to be mediated by the inhibition of Rac, which can be restored by co-treatment with geranylgeranyl pyrophosphate that participates in post-translational modifications of Rac [199]. Moreover, simvastatin blocks the activation of Akt signalling in myoblasts and myotubes and reduces MyoD expression [200,201]. In addition, simvastatin increases the production of ROS, followed by the release of cytochrome *c* which induces the apoptosis of myoblasts [201]. The increase in miR-1a level that inhibits MAP3K1 (mitogen-activated protein kinase kinase kinase 1) is another simvastatin-activated cascade leading to myoblast apoptosis (Figure 3) [202]. Discrepancies are observed in the literature regarding the susceptibility to statin-induced cytotoxic effect in the different stages of myogenesis. Some studies show that myoblasts are more affected than myotubes, while others indicate the opposite, which could depend on the outcome measured [200,201].

### Other medications

In addition to glucocorticoids and statins, other types of drugs are also known to cause toxic myopathies that impair the proper functioning of MuSCs.

Colchicine, a drug used to reduce inflammation to treat gout and other inflammatory disorders, is also associated with toxic myopathies, particularly when combined with other medications such as statins [203]. Combination of



colchicine and statins simultaneously activates autophagy signaling and inhibits the degradation of the newly formed autophagosome, leading to myotoxicity [204]. Administration of colchicine in young and old mice was shown to impair autophagy resulting in dysfunctions in skeletal muscle mitochondria [205]. *In vitro*, the addition of colchicine blocked cell division in myoblasts and led to myotube fragmentation [206]. In different models of muscle regeneration, the administration of colchicine was shown to block myogenesis and the formation of new myotubes, especially when administered during the peak of cell division around 3 days post-injury [207,208].

Chloroquine, an anti-malarian drug, has also been associated with toxic myopathies [209]. Treatment of C2C12 myoblasts with chloroquine showed a dose-dependent reduction in autophagy [210]. Blocking autophagy with chloroquine in single myofibers or freshly sorted MuSCs *in vitro* inhibits MuSC activation and cell cycle entry [211]. Treatment of 3D muscle construct *in vitro* with increasing doses of chloroquine showed a reduction in contractile protein expression and tetanus force of the muscle tissue [212].

Metformin, a hypoglycemic agent used in the treatment of Type 2 diabetes can also affect MuSC function. Treatment of single myofibers with metformin delays the activation of MuSCs and their cell cycle entry [213]. Moreover, administration of metformin to myoblast cultured *in vitro* delays their differentiation and the formation of myotubes. Metformin inhibits the phosphorylation of ribosomal protein S6 in MuSCs, which could explain part of the phenotype observed. *In vivo*, the administration of metformin during muscle regeneration post-cardiotoxin injury reduced the number of centro-nucleated fibers and the size of the newly formed fibers [213].

Altogether, these findings show that glucocorticoids, statins, and others class of drugs impair the function of MuSCs. Moreover, interactions between certain drugs accentuate the negative effects observed on MuSCs [214,215].

## Therapeutics avenues

As described in the previous sections, acquired myopathies can impair MuSC function through different direct and indirect mechanisms (Figures 1-3). In consequences, the optimal therapeutic approach will vary depending on the causative agent (e.g., comorbidities, inflammation/infection, or side effect of drugs). Novel insights on the underlying mechanisms of MuSC defects open new therapeutics avenues that could alleviate the muscular symptoms in acquired myopathies.

Adapted physical activity is considered one of the most effective strategies to counteract muscle atrophy and impaired muscle regeneration related to chronic inflammatory diseases [216]. Regular physical activity is known to reduce inflammation [217,218], increase the expression of genes related to myofibers metabolism and MuSC function [219,220], and expand the MuSC pool [221–223]. Physical activity was also found to be beneficial in autoimmune myositis [224–226]. Physical exercise was also shown to reduce some of the muscular symptoms associated with statins [227]; however, the impact on MuSC is unknown.

Another dysregulated process that is a common feature of many acquired myopathies is the overproduction of ROS. Antioxidants were tested as another strategy to enhance MuSC function and muscle regeneration in acquired myopathies. Vitamin E supplementation can modulate inflammation [228] and improve antioxidant defenses [229], protein synthesis, and myogenic markers in skeletal muscle [230]. However, antioxidant treatment such as vitamins C and E were unsuccessful to restore muscle function in COPD patients [231,232]. Nonetheless, antioxidant therapies could be used in combination with other approaches such as adapted physical activity to improve the impact on muscle recovery in patients with COPD [233].

Chronic inflammation is also a hallmark of many myopathies, and consequently, anti-inflammatory drugs were investigated as a therapeutic approach for acquired myopathies. As discussed above, while glucocorticoids are one of the most widely used anti-inflammatory drugs, they can also impair MuSC function and stimulate muscle atrophy. Therefore, other molecules have been explored such as neutralizing antibodies or antagonists targeting specific cytokines or their receptors. For instance, anti-TNF- $\alpha$  therapies such as infliximab reduced inflammation and enhanced muscle regeneration post-injury [234]. However, anti-TNF- $\alpha$  therapies led to disappointing results in clinical trials for diseases such as COPD, heart failure, and polymyositis/dermatomyositis [235–238]. Further investigation with novel TNF- $\alpha$  inhibitors (e.g., etanercept), or drugs targeting other cytokines such as IL-1 (e.g., anakinra) or IL-6 (tocilizumab) are ongoing [239]. Nevertheless, it is possible that the inhibition of only one cytokine will not be sufficient to overcome the chronic and complex inflammatory process in acquired myopathies [240]. Other medication targeting upstream inflammatory signaling pathways, such as NF- $\kappa$ B or p38MAPK inhibitors, are currently investigated in clinical trials [241]. Overactivation of the NF- $\kappa$ B pathway in MuSCs from a mouse model of DMD was shown to contribute to the exhaustion of the MuSC pool and to the impaired muscle regenerative capacity [242]. Consequently, NF- $\kappa$ B inhibition was shown to enhance muscle function in mouse and dog models of DMD [243]. Recently, a new class of bioactive lipids derived from omega-3 fatty acids, named resolvins, has shown promise for different immune-related diseases. Resolvin-D2 was shown to enhance muscle function compared to glucocorticoids by

targeting inflammation and rescuing MuSC regenerative capacity in a mouse model of DMD [104]. Resolvin-D1 was shown to reduce inflammation and oxidative stress in a model of COPD [244]. The impact of pro-resolving bioactive lipids on diseases such as asthma is currently investigated in clinical trials [245].

In addition to pharmaceutical molecules, the therapeutic potential of cellular therapies has also been explored for acquired myopathies [239]. Injection of mesenchymal stem cells in the muscle of mice submitted to a caecal ligation and puncture model of sepsis, was shown to reduce proinflammatory signals, restore the mitochondrial and metabolic function of MuSCs and their regenerative potential, resulting in enhanced muscle strength [139]. Case reports have shown that the transplantation of autologous stem cells or allogenic mesenchymal stem cells could alleviate the symptoms and enhance muscle strength in refractory cases of myositis [246–249]. However, high quality randomized controlled trials are needed to fully delineate the therapeutic potential of cell transplantation for the treatment of acquired myopathies.

## Conclusion

MuSCs are the cellular protagonists providing the remarkable regenerative capacity of skeletal muscle. Their activity is closely regulated by molecular and cellular components of their niche. Disturbance in the fine balance between MuSCs and their microenvironment can affect their ability to activate, proliferate, differentiate, and fuse to restore tissue integrity and function. Different pathological conditions (e.g., comorbidities, infections, or chronic drug exposure) are associated with the development of acquired myopathies. In this review, we demonstrated that many acquired myopathies trigger inflammatory mechanisms that are responsible of an imbalance in the microenvironment of MuSCs leading to an alteration of their function. Alternatively, the causal agents of these acquired myopathies can also directly target MuSCs to affect their expression of MRFs and impair their function and cell fate decision. MuSC defects in acquired myopathies could contribute to muscle atrophy/weakness and to the progression of the diseases. Considering the crucial role of MuSCs in muscle growth and regeneration, it is important to understand the underlying mechanisms leading to MuSC defects, in order to develop new therapeutic avenues to rescue MuSC function and alleviate the progression of the symptoms in acquired myopathies.

## Competing Interests

The authors declare that there are no competing interests associated with the manuscript.

## Funding

A.D. and L.R. are supported by FQRNT (Fonds Québécois de la recherche - nature et les technologies) scholarships. Z.O. is supported by a MITACS fellowship. N.A.D. is supported by FRQS (Fonds Québécois de la recherche – Santé) Junior-2 award and by research grants from Canadian Institutes of Health Research (CIHR #PJT-156408), and Natural sciences and engineering research council of Canada (NSERC #RGPIN-05979-2018). We acknowledge the support of the Quebec Cell, Tissue and Gene Therapy Network –ThéCell (a thematic network supported by the FRQS).

## CRedit Author Contribution

**Alyson Deprez:** Conceptualization, Visualization, Writing—original draft, Project administration, Writing—review & editing. **Zakaria Orfi:** Writing—original draft, Writing—review & editing. **Lupann Rieger:** Writing—original draft, Writing—review & editing. **Nicolas Alexandre Dumont:** Conceptualization, Resources, Supervision, Funding acquisition, Validation, Writing—original draft, Project administration, Writing—review & editing.

## Abbreviations

ACE2, angiotensin-converting enzyme 2; CDK2, cyclin dependent kinase-2; CHF, chronic heart failure; CKD, chronic kidney disease; DMD, Duchenne muscular dystrophy; HMGCR, 3-hydroxy-3-methylglutaryl-CoA reductase; IFN-I, type I interferon; MIF, macrophage migration inhibitory factor; MRF, myogenic regulatory factor; MuSC, muscle stem cell; MYF5, myogenic factor 5; MYOD1, myoblast determination protein 1; MYOG, myogenin; PAX7, paired box protein 7; PGE2, prostaglandin-E2; PTGS1, prostaglandin-endoperoxide synthase 1; ROS, reactive oxygen species; SARS-Cov-2, severe acute respiratory syndrome coronavirus 2; SRP, signal recognition particle.

## References

- 1 Mauro, A. (1961) Satellite cell of skeletal muscle fibers. *J. Biophys. Biochem. Cytol.* **9**, 493–495, <https://doi.org/10.1083/jcb.9.2.493>
- 2 Sousa-Victor, P., Gutarra, S., Garcia-Prat, L., Rodriguez-Ubrea, J., Ortet, L., Ruiz-Bonilla, V. et al. (2014) Geriatric muscle stem cells switch reversible quiescence into senescence. *Nature* **506**, 316–321, Epub 20140212, <https://doi.org/10.1038/nature13013>

- 3 von Maltzahn, J., Jones, A.E., Parks, R.J. and Rudnicki, M.A. (2013) Pax7 is critical for the normal function of satellite cells in adult skeletal muscle. *Proc. Natl. Acad. Sci. U.S.A.* **110**, 16474–16479, Epub 20130924, <https://doi.org/10.1073/pnas.1307680110>
- 4 Millay, D.P., Sutherland, L.B., Bassel-Duby, R. and Olson, E.N. (2014) Myomaker is essential for muscle regeneration. *Genes Dev.* **28**, 1641–1646, <https://doi.org/10.1101/gad.247205.114>
- 5 Bi, P., Ramirez-Martinez, A., Li, H., Cannavino, J., McAnally, J.R., Shelton, J.M. et al. (2017) Control of muscle formation by the fusogenic micropeptide myomixer. *Science* **356**, 323–327, Epub 20170406, <https://doi.org/10.1126/science.aam9361>
- 6 Zhang, Q., Vashisht, A.A., O'Rourke, J., Corbel, S.Y., Moran, R., Romero, A. et al. (2017) The microprotein minion controls cell fusion and muscle formation. *Nat. Commun.* **8**, 15664, Epub 20170601, <https://doi.org/10.1038/ncomms15664>
- 7 Quinn, M.E., Goh, Q., Kurosaka, M., Gamage, D.G., Petrany, M.J., Prasad, V. et al. (2017) Myomerger induces fusion of non-fusogenic cells and is required for skeletal muscle development. *Nat. Commun.* **8**, 15665, Epub 20170601, <https://doi.org/10.1038/ncomms15665>
- 8 Leikina, E., Gamage, D.G., Prasad, V., Goykhberg, J., Crowe, M., Diao, J. et al. (2018) Myomaker and myomerger work independently to control distinct steps of membrane remodeling during myoblast fusion. *Dev. Cell* **46**, 767.e7–780.e7, Epub 20180906, <https://doi.org/10.1016/j.devcel.2018.08.006>
- 9 Partridge, T. (2002) Myoblast transplantation. *Neuromuscul. Disord.* **12**, S3–S6, [https://doi.org/10.1016/S0960-8966\(02\)00076-7](https://doi.org/10.1016/S0960-8966(02)00076-7)
- 10 Morgan, J.E. and Partridge, T.A. (2003) Muscle satellite cells. *Int. J. Biochem. Cell Biol.* **35**, 1151–1156, [https://doi.org/10.1016/S1357-2725\(03\)00042-6](https://doi.org/10.1016/S1357-2725(03)00042-6)
- 11 Collins, C.A., Olsen, I., Zammit, P.S., Heslop, L., Petrie, A., Partridge, T.A. et al. (2005) Stem cell function, self-renewal, and behavioral heterogeneity of cells from the adult muscle satellite cell niche. *Cell* **122**, 289–301, <https://doi.org/10.1016/j.cell.2005.05.010>
- 12 Lahmann, I., Zhang, Y., Baum, K., Wolf, J. and Birchmeier, C. (2021) An oscillatory network controlling self-renewal of skeletal muscle stem cells. *Exp. Cell Res.* **409**, 112933, Epub 20211115, <https://doi.org/10.1016/j.yexcr.2021.112933>
- 13 Gioftsidis, S., Relaix, F. and Mourikis, P. (2022) The Notch signaling network in muscle stem cells during development, homeostasis, and disease. *Skelet Muscle* **12**, 9, Epub 20220422, <https://doi.org/10.1186/s13395-022-00293-w>
- 14 Bentzinger, C.F., Wang, Y.X., von Maltzahn, J., Soleimani, V.D., Yin, H. and Rudnicki, M.A. (2013) Fibronectin regulates Wnt7a signaling and satellite cell expansion. *Cell Stem Cell* **12**, 75–87, <https://doi.org/10.1016/j.stem.2012.09.015>
- 15 Urciuolo, A., Quarta, M., Morbidoni, V., Gattazzo, F., Molon, S., Grumati, P. et al. (2013) Collagen VI regulates satellite cell self-renewal and muscle regeneration. *Nat. Commun.* **4**, 1964, <https://doi.org/10.1038/ncomms2964>
- 16 Baghdadi, M.B., Castel, D., Machado, L., Fukada, S.I., Birk, D.E., Relaix, F. et al. (2018) Reciprocal signalling by Notch–Collagen V–CALCR retains muscle stem cells in their niche. *Nature* **557**, 714–718, Epub 20180523, <https://doi.org/10.1038/s41586-018-0144-9>
- 17 Ganassi, M., Muntoni, F. and Zammit, P.S. (2022) Defining and identifying satellite cell–opathies within muscular dystrophies and myopathies. *Exp. Cell Res.* **411**, 112906, Epub 20211103, <https://doi.org/10.1016/j.yexcr.2021.112906>
- 18 Feichtinger, R.G., Mucha, B.E., Hengel, H., Orfi, Z., Makowski, C., Dort, J. et al. (2019) Biallelic variants in the transcription factor PAX7 are a new genetic cause of myopathy. *Genet. Med.* **21**, 2521–2531, Epub 20190516, <https://doi.org/10.1038/s41436-019-0532-z>
- 19 Ganassi, M. and Zammit, P.S. (2022) Involvement of muscle satellite cell dysfunction in neuromuscular disorders: expanding the portfolio of satellite cell–opathies. *Eur. J. Transl. Myol.* **32**, Epub 20220318, <https://doi.org/10.4081/ejtm.2022.10064>
- 20 Dumont, N.A., Bentzinger, C.F., Sincennes, M.C. and Rudnicki, M.A. (2015) Satellite cells and skeletal muscle regeneration. *Compr. Physiol.* **5**, 1027–1059, <https://doi.org/10.1002/cphy.c140068>
- 21 Boyer, O., Butler-Browne, G., Chinoy, H., Cossu, G., Galli, F., Lilleker, J.B. et al. (2021) Myogenic cell transplantation in genetic and acquired diseases of skeletal muscle. *Front Genet.* **12**, 702547, Epub 20210802, <https://doi.org/10.3389/fgene.2021.702547>
- 22 Sacco, A., Mourikioti, F., Tran, R., Choi, J., Llewellyn, M., Kraft, P. et al. (2010) Short telomeres and stem cell exhaustion model Duchenne muscular dystrophy in mdx/mTR mice. *Cell* **143**, 1059–1071, Epub 20101209, <https://doi.org/10.1016/j.cell.2010.11.039>
- 23 Dumont, N.A., Wang, Y.X., von Maltzahn, J., Pasut, A., Bentzinger, C.F., Brun, C.E. et al. (2015) Dystrophin expression in muscle stem cells regulates their polarity and asymmetric division. *Nat. Med.* **21**, 1455–1463, Epub 20151116, <https://doi.org/10.1038/nm.3990>
- 24 Irintchev, A., Zweyer, M. and Wernig, A. (1997) Impaired functional and structural recovery after muscle injury in dystrophic mdx mice. *Neuromuscul. Disord.* **7**, 117–125, [https://doi.org/10.1016/S0960-8966\(96\)00422-1](https://doi.org/10.1016/S0960-8966(96)00422-1)
- 25 Reimann, J., Irintchev, A. and Wernig, A. (2000) Regenerative capacity and the number of satellite cells in soleus muscles of normal and mdx mice. *Neuromuscul. Disord.* **10**, 276–282, [https://doi.org/10.1016/S0960-8966\(99\)00118-2](https://doi.org/10.1016/S0960-8966(99)00118-2)
- 26 Petrilli, L.L., Spada, F., Palma, A., Reggioni, A., Rosina, M., Gargioli, C. et al. (2020) High-dimensional single-cell quantitative profiling of skeletal muscle cell population dynamics during regeneration. *Cells* **9**, Epub 20200718, <https://doi.org/10.3390/cells9071723>
- 27 Markworth, J.F., Brown, L.A., Lim, E., Castor-Macias, J.A., Larouche, J., Macpherson, P.C.D. et al. (2021) Metabolomic profiling reveals an age-related deficiency of skeletal muscle pro-resolving mediators that contributes to maladaptive tissue remodeling. *Aging Cell* **20**, e13393, Epub 20210602, <https://doi.org/10.1111/acer.13393>
- 28 Thorley, M., Malatras, A., Duddy, W., Le Gall, L., Mouly, V., Butler Browne, G. et al. (2015) Changes in Communication between Muscle Stem Cells and their Environment with Aging. *J. Neuromuscul. Dis.* **2**, 205–217, <https://doi.org/10.3233/JND-150097>
- 29 Brett, J.O., Arjona, M., Ikeda, M., Quarta, M., de Morree, A., Egner, I.M. et al. (2020) Exercise rejuvenates quiescent skeletal muscle stem cells in old mice through restoration of Cyclin D1. *Nat. Metab.* **2**, 307–317, Epub 20200413, <https://doi.org/10.1038/s42255-020-0190-0>
- 30 Di Girolamo, D. and Tajbakhsh, S. (2022) Pathological features of tissues and cell populations during cancer cachexia. *Cell Regen* **11**, 15, Epub 20220420, <https://doi.org/10.1186/s13619-022-00108-9>
- 31 Hogan, K.A., Cho, D.S., Arneson, P.C., Samani, A., Palines, P., Yang, Y. et al. (2018) Tumor-derived cytokines impair myogenesis and alter the skeletal muscle immune microenvironment. *Cytokine* **107**, 9–17, Epub 20171117, <https://doi.org/10.1016/j.cyto.2017.11.006>

- 32 He, W.A., Berardi, E., Cardillo, V.M., Acharyya, S., Aulino, P., Thomas-Ahner, J. et al. (2013) NF- $\kappa$ B-mediated Pax7 dysregulation in the muscle microenvironment promotes cancer cachexia. *J. Clin. Invest.* **123**, 4821–4835, <https://doi.org/10.1172/JCI68523>
- 33 Mu, X., Agarwal, R., March, D., Rothenberg, A., Voigt, C., Tebbets, J. et al. (2016) Notch signaling mediates skeletal muscle atrophy in cancer cachexia caused by osteosarcoma. *Sarcoma* **2016**, 3758162, Epub 20160609, <https://doi.org/10.1155/2016/3758162>
- 34 Costamagna, D., Duellen, R., Penna, F., Neumann, D., Costelli, P. and Sampaolesi, M. (2020) Interleukin-4 administration improves muscle function, adult myogenesis, and lifespan of colon carcinoma-bearing mice. *J. Cachexia Sarcopenia Muscle* **11**, 783–801, Epub 20200227, <https://doi.org/10.1002/jcsm.12539>
- 35 Hwang, A.B. and Brack, A.S. (2018) Muscle stem cells and aging. *Curr. Top. Dev. Biol.* **126**, 299–322, Epub 20171116, <https://doi.org/10.1016/bs.ctdb.2017.08.008>
- 36 Andre, L.M., Ausems, C.R.M., Wansink, D.G. and Wieringa, B. (2018) Abnormalities in skeletal muscle myogenesis, growth, and regeneration in myotonic dystrophy. *Front. Neurol.* **9**, 368, Epub 20180528, <https://doi.org/10.3389/fneur.2018.00368>
- 37 Muñoz-Cánoves, P., Neves, J. and Sousa-Victor, P. (2020) Understanding muscle regenerative decline with aging: new approaches to bring back youthfulness to aged stem cells. *FEBS J.* **287**, 406–416, Epub 20200103, <https://doi.org/10.1111/febs.15182>
- 38 Gan, W.Q., Man, S.F., Senthilselvan, A. and Sin, D.D. (2004) Association between chronic obstructive pulmonary disease and systemic inflammation: a systematic review and a meta-analysis. *Thorax* **59**, 574–580, <https://doi.org/10.1136/thx.2003.019588>
- 39 Gosselink, R., Troosters, T. and Decramer, M. (1996) Peripheral muscle weakness contributes to exercise limitation in COPD. *Am. J. Respir. Crit. Care Med.* **153**, 976–980, <https://doi.org/10.1164/ajrccm.153.3.8630582>
- 40 Couillard, A., Maltais, F., Saey, D., Debigare, R., Michaud, A., Koechlin, C. et al. (2003) Exercise-induced quadriceps oxidative stress and peripheral muscle dysfunction in patients with chronic obstructive pulmonary disease. *Am. J. Respir. Crit. Care Med.* **167**, 1664–1669, Epub 20030402, <https://doi.org/10.1164/rccm.200209-10280C>
- 41 Spruit, M.A., Gosselink, R., Troosters, T., Kasran, A., Gayan-Ramirez, G., Bogaerts, P. et al. (2003) Muscle force during an acute exacerbation in hospitalised patients with COPD and its relationship with CXCL8 and IGF-I. *Thorax* **58**, 752–756, <https://doi.org/10.1136/thorax.58.9.752>
- 42 van den Borst, B., Slot, I.G., Hellwig, V.A., Vosse, B.A., Kelders, M.C., Barreiro, E. et al. (2013) Loss of quadriceps muscle oxidative phenotype and decreased endurance in patients with mild-to-moderate COPD. *J. Appl. Physiol. (1985)* **114**, 1319–1328, Epub 20120719, <https://doi.org/10.1152/jappphysiol.00508.2012>
- 43 Abdulai, R.M., Jensen, T.J., Patel, N.R., Polkey, M.I., Jansson, P., Celli, B.R. et al. (2018) Deterioration of Limb Muscle Function during Acute Exacerbation of Chronic Obstructive Pulmonary Disease. *Am. J. Respir. Crit. Care Med.* **197**, 433–449, <https://doi.org/10.1164/rccm.201703-0615CI>
- 44 Forrester, S.J., Kikuchi, D.S., Hernandez, M.S., Xu, Q. and Griendling, K.K. (2018) Reactive oxygen species in metabolic and inflammatory signaling. *Circ. Res.* **122**, 877–902, <https://doi.org/10.1161/CIRCRESAHA.117.311401>
- 45 Zhou, J., Liu, B., Liang, C., Li, Y. and Song, Y.H. (2016) Cytokine signaling in skeletal muscle wasting. *Trends Endocrinol. Metab.* **27**, 335–347, Epub 20160326, <https://doi.org/10.1016/j.tem.2016.03.002>
- 46 Liu, T., Zhang, L., Joo, D. and Sun, S.C. (2017) NF- $\kappa$ B signaling in inflammation. *Signal Transduct. Target Ther.* **2**, 17023, Epub 20170714, <https://doi.org/10.1038/sigtrans.2017.23>
- 47 Wu, C.L., Kandarian, S.C. and Jackman, R.W. (2011) Identification of genes that elicit disuse muscle atrophy via the transcription factors p50 and Bcl-3. *PLoS ONE* **6**, e16171, Epub 20110113, <https://doi.org/10.1371/journal.pone.0016171>
- 48 Balnis, J., Drake, L.A., Singer, D.V., Vincent, C.E., Korponay, T.C., D'Armiento, J. et al. (2022) Deaccelerated myogenesis and autophagy in genetically induced pulmonary emphysema. *Am. J. Respir. Cell Mol. Biol.* **66**, 623–637, <https://doi.org/10.1165/rcmb.2021-03510C>
- 49 Guo, Y., Gosker, H.R., Schols, A.M., Kapchinsky, S., Bourbeau, J., Sandri, M. et al. (2013) Autophagy in locomotor muscles of patients with chronic obstructive pulmonary disease. *Am. J. Respir. Crit. Care Med.* **188**, 1313–1320, <https://doi.org/10.1164/rccm.201304-07320C>
- 50 Puig-Vilanova, E., Rodriguez, D.A., Lloreta, J., Ausin, P., Pascual-Guardia, S., Broquetas, J. et al. (2015) Oxidative stress, redox signaling pathways, and autophagy in cachectic muscles of male patients with advanced COPD and lung cancer. *Free Radic. Biol. Med.* **79**, 91–108, Epub 20141118, <https://doi.org/10.1016/j.freeradbiomed.2014.11.006>
- 51 Langen, R.C., Schols, A.M., Kelders, M.C., van der Velden, J.L., Wouters, E.F. and Janssen-Heininger, Y.M. (2006) Muscle wasting and impaired muscle regeneration in a murine model of chronic pulmonary inflammation. *Am. J. Respir. Cell Mol. Biol.* **35**, 689–696, Epub 20060622, <https://doi.org/10.1165/rcmb.2006-01030C>
- 52 Byun, M.K., Cho, E.N., Chang, J., Ahn, C.M. and Kim, H.J. (2017) Sarcopenia correlates with systemic inflammation in COPD. *Int. J. Chron. Obstruct. Pulmon. Dis.* **12**, 669–675, Epub 20170220, <https://doi.org/10.2147/COPD.S130790>
- 53 Wei, J., Xiong, X.F., Lin, Y.H., Zheng, B.X. and Cheng, D.Y. (2015) Association between serum interleukin-6 concentrations and chronic obstructive pulmonary disease: a systematic review and meta-analysis. *PeerJ* **3**, e1199, Epub 20150827, <https://doi.org/10.7717/peerj.1199>
- 54 Crul, T., Spruit, M.A., Gayan-Ramirez, G., Quarck, R., Gosselink, R., Troosters, T. et al. (2007) Markers of inflammation and disuse in vastus lateralis of chronic obstructive pulmonary disease patients. *Eur. J. Clin. Invest.* **37**, 897–904, Epub 20070920, <https://doi.org/10.1111/j.1365-2362.2007.01867.x>
- 55 Haddad, F., Zaldivar, F., Cooper, D.M. and Adams, G.R. (2005) IL-6-induced skeletal muscle atrophy. *J. Appl. Physiol. (1985)* **98**, 911–917, Epub 20041112, <https://doi.org/10.1152/jappphysiol.01026.2004>
- 56 Goodman, M.N. (1991) Tumor necrosis factor induces skeletal muscle protein breakdown in rats. *Am. J. Physiol.* **260**, E727–E730, <https://doi.org/10.1152/ajpendo.1991.260.5.E727>
- 57 Theriault, M.E., Pare, M.E., Lemire, B.B., Maltais, F. and Debigare, R. (2014) Regenerative defect in vastus lateralis muscle of patients with chronic obstructive pulmonary disease. *Respir. Res.* **15**, 35, Epub 20140325, <https://doi.org/10.1186/1465-9921-15-35>
- 58 Theriault, M.E., Pare, M.E., Maltais, F. and Debigare, R. (2012) Satellite cells senescence in limb muscle of severe patients with COPD. *PLoS ONE* **7**, e39124, Epub 20120613, <https://doi.org/10.1371/journal.pone.0039124>



- 59 Sancho-Munoz, A., Guitart, M., Rodriguez, D.A., Gea, J., Martinez-Llorens, J. and Barreiro, E. (2021) Deficient muscle regeneration potential in sarcopenic COPD patients: Role of satellite cells. *J. Cell. Physiol.* **236**, 3083–3098, Epub 20200928, <https://doi.org/10.1002/jcp.30073>
- 60 Pomies, P., Rodriguez, J., Blaquiére, M., Sedraoui, S., Gouzi, F., Carnac, G. et al. (2015) Reduced myotube diameter, atrophic signalling and elevated oxidative stress in cultured satellite cells from COPD patients. *J. Cell. Mol. Med.* **19**, 175–186, Epub 20141022, <https://doi.org/10.1111/jcmm.12390>
- 61 Walsh, F.S. and Celeste, A.J. (2005) Myostatin: a modulator of skeletal-muscle stem cells. *Biochem. Soc. Trans.* **33**, 1513–1517, <https://doi.org/10.1042/BSOT0331513>
- 62 Vogiatzis, I., Simoes, D.C., Stratakos, G., Kourepini, E., Terzis, G., Manta, P. et al. (2010) Effect of pulmonary rehabilitation on muscle remodelling in cachectic patients with COPD. *Eur. Respir. J.* **36**, 301–310, Epub 20100128, <https://doi.org/10.1183/09031936.00112909>
- 63 Rommel, C., Bodine, S.C., Clarke, B.A., Rossman, R., Nunez, L., Stitt, T.N. et al. (2001) Mediation of IGF-1-induced skeletal myotube hypertrophy by PI(3)K/Akt/mTOR and PI(3)K/Akt/GSK3 pathways. *Nat. Cell Biol.* **3**, 1009–1013, <https://doi.org/10.1038/ncb1101-1009>
- 64 Mourkioti, F. and Rosenthal, N. (2005) IGF-1, inflammation and stem cells: interactions during muscle regeneration. *Trends Immunol.* **26**, 535–542, <https://doi.org/10.1016/j.it.2005.08.002>
- 65 Zhang, L., Wang, X.H., Wang, H., Du, J. and Mitch, W.E. (2010) Satellite cell dysfunction and impaired IGF-1 signaling cause CKD-induced muscle atrophy. *J. Am. Soc. Nephrol.* **21**, 419–427, Epub 20100107, <https://doi.org/10.1681/ASN.2009060571>
- 66 Mesquita, T., Lin, Y.N. and Ibrahim, A. (2021) Chronic low-grade inflammation in heart failure with preserved ejection fraction. *Aging Cell* **20**, e13453, Epub 20210812, <https://doi.org/10.1111/accel.13453>
- 67 Sayer, G. and Bhat, G. (2014) The renin-angiotensin-aldosterone system and heart failure. *Cardiol. Clin.* **32**, 21–32, vii, <https://doi.org/10.1016/j.ccl.2013.09.002>
- 68 Brunjes, D.L., Kennel, P.J. and Christian Schulze, P. (2017) Exercise capacity, physical activity, and morbidity. *Heart Fail. Rev.* **22**, 133–139, <https://doi.org/10.1007/s10741-016-9592-1>
- 69 Santos, D.P., Okoshi, K., Moreira, V.O., Seiva, F.R., Almeida, F.L., Padovani, C.R. et al. (2010) Growth hormone attenuates skeletal muscle changes in experimental chronic heart failure. *Growth Horm. IGF Res.* **20**, 149–155, Epub 20100108, <https://doi.org/10.1016/j.ghir.2009.11.007>
- 70 Springer, J., Springer, J.I. and Anker, S.D. (2017) Muscle wasting and sarcopenia in heart failure and beyond: update 2017. *ESC Heart Fail.* **4**, 492–498, <https://doi.org/10.1002/ehf2.12237>
- 71 Carvalho, R.F., Cicogna, A.C., Campos, G.E., Lopes Fda, S., Sugizaki, M.M., Nogueira, C.R. et al. (2006) Heart failure alters MyoD and MRF4 expressions in rat skeletal muscle. *Int. J. Exp. Pathol.* **87**, 219–225, <https://doi.org/10.1111/j.1365-2613.2006.00475.x>
- 72 Song, Y.H., Li, Y., Du, J., Mitch, W.E., Rosenthal, N. and Delafontaine, P. (2005) Muscle-specific expression of IGF-1 blocks angiotensin II-induced skeletal muscle wasting. *J. Clin. Invest.* **115**, 451–458, <https://doi.org/10.1172/JCI22324>
- 73 Yoshida, T. and Delafontaine, P. (2016) An intronic enhancer element regulates angiotensin II Type 2 receptor expression during satellite cell differentiation, and its activity is suppressed in congestive heart failure. *J. Biol. Chem.* **291**, 25578–25590, Epub 20161018, <https://doi.org/10.1074/jbc.M116.752501>
- 74 Yoshida, T., Galvez, S., Tiwari, S., Rezk, B.M., Semprun-Prieto, L., Higashi, Y. et al. (2013) Angiotensin II inhibits satellite cell proliferation and prevents skeletal muscle regeneration. *J. Biol. Chem.* **288**, 23823–23832, Epub 20130706, <https://doi.org/10.1074/jbc.M112.449074>
- 75 Yoshida, T., Huq, T.S. and Delafontaine, P. (2014) Angiotensin type 2 receptor signaling in satellite cells potentiates skeletal muscle regeneration. *J. Biol. Chem.* **289**, 26239–26248, Epub 20140811, <https://doi.org/10.1074/jbc.M114.585521>
- 76 Munzenmaier, D.H. and Greene, A.S. (1996) Opposing actions of angiotensin II on microvascular growth and arterial blood pressure. *Hypertension* **27**, 760–765, <https://doi.org/10.1161/01.HYP.27.3.760>
- 77 Wang, X., Khaidakov, M., Ding, Z., Mitra, S., Lu, J., Liu, S. et al. (2012) Cross-talk between inflammation and angiotensin II: studies based on direct transfection of cardiomyocytes with AT1R and AT2R cDNA. *Exp. Biol. Med. (Maywood)* **237**, 1394–1401, <https://doi.org/10.1258/ebm.2012.012212>
- 78 Inuzuka, T., Fujioka, Y., Tsuda, M., Fujioka, M., Satoh, A.O., Horiuchi, K. et al. (2016) Attenuation of ligand-induced activation of angiotensin II type 1 receptor signaling by the type 2 receptor via protein kinase C. *Sci. Rep.* **6**, 21613, Epub 20160209, <https://doi.org/10.1038/srep21613>
- 79 Dmitrieva, R.I., Lelyavina, T.A., Komarova, M.Y., Galenko, V.L., Ivanova, O.A., Tikanova, P.A. et al. (2019) Skeletal muscle resident progenitor cells coexpress mesenchymal and myogenic markers and are not affected by chronic heart failure-induced dysregulations. *Stem Cells Int.* **2019**, 5690345, Epub 20190103, <https://doi.org/10.1155/2019/5690345>
- 80 Knapp, F., Niemann, B., Li, L., Molenda, N., Kracht, M., Schulz, R. et al. (2020) Differential effects of right and left heart failure on skeletal muscle in rats. *J. Cachexia Sarcopenia Muscle* **11**, 1830–1849, Epub 20200928, <https://doi.org/10.1002/jcsm.12612>
- 81 Katano, S., Yano, T., Shimizu, M., Ohori, K., Kouzu, H., Koyama, M. et al. (2021) Does renin-angiotensin system inhibition have impacts on muscle mass and bone mineral density in heart failure patients? *ESC Heart Fail.* **8**, 2617–2624, Epub 20210518, <https://doi.org/10.1002/ehf2.13430>
- 82 Wang, X.H., Du, J., Klein, J.D., Bailey, J.L. and Mitch, W.E. (2009) Exercise ameliorates chronic kidney disease-induced defects in muscle protein metabolism and progenitor cell function. *Kidney Int.* **76**, 751–759, Epub 20090729, <https://doi.org/10.1038/ki.2009.260>
- 83 Carrero, J.J., Chmielewski, M., Axelsson, J., Snaedal, S., Heimbürger, O., Barany, P. et al. (2008) Muscle atrophy, inflammation and clinical outcome in incident and prevalent dialysis patients. *Clin. Nutr.* **27**, 557–564, Epub 20080606, <https://doi.org/10.1016/j.cnu.2008.04.007>
- 84 Bailey, J.L., Zheng, B., Hu, Z., Price, S.R. and Mitch, W.E. (2006) Chronic kidney disease causes defects in signaling through the insulin receptor substrate/phosphatidylinositol 3-kinase/Akt pathway: implications for muscle atrophy. *J. Am. Soc. Nephrol.* **17**, 1388–1394, Epub 20060412, <https://doi.org/10.1681/ASN.2004100842>
- 85 Wosczyzna, M.N. and Rando, T.A. (2018) A muscle stem cell support group: coordinated cellular responses in muscle regeneration. *Dev. Cell* **46**, 135–143, <https://doi.org/10.1016/j.devcel.2018.06.018>
- 86 Cantini, M. and Carraro, U. (1995) Macrophage-released factor stimulates selectively myogenic cells in primary muscle culture. *J. Neuropathol. Exp. Neurol.* **54**, 121–128, <https://doi.org/10.1097/00005072-199501000-00014>

- 87 Tidball, J.G. (2005) Inflammatory processes in muscle injury and repair. *Am. J. Physiol. Regul. Integr. Comp. Physiol.* **288**, R345–R353, <https://doi.org/10.1152/ajpregu.00454.2004>
- 88 Tidball, J.G. and Villalta, S.A. (2010) Regulatory interactions between muscle and the immune system during muscle regeneration. *Am. J. Physiol. Regul. Integr. Comp. Physiol.* **298**, R1173–R1187, Epub 20100310, <https://doi.org/10.1152/ajpregu.00735.2009>
- 89 Dort, J., Fabre, P., Molina, T. and Dumont, N.A. (2019) Macrophages are key regulators of stem cells during skeletal muscle regeneration and diseases. *Stem Cells Int.* **2019**, 4761427, Epub 20190714, <https://doi.org/10.1155/2019/4761427>
- 90 Ziemkiewicz, N., Hilliard, G., Pullen, N.A. and Garg, K. (2021) The role of innate and adaptive immune cells in skeletal muscle regeneration. *Int. J. Mol. Sci.* **22**, Epub 20210323, <https://doi.org/10.3390/ijms22063265>
- 91 Fielding, R.A., Manfredi, T.J., Ding, W., Fiatarone, M.A., Evans, W.J. and Cannon, J.G. (1993) Acute phase response in exercise. III. Neutrophil and IL-1 beta accumulation in skeletal muscle. *Am. J. Physiol.* **265**, R166–R172, <https://doi.org/10.1152/ajpregu.1993.265.1.R166>
- 92 Dumont, N., Bouchard, P. and Frenette, J. (2008) Neutrophil-induced skeletal muscle damage: a calculated and controlled response following hindlimb unloading and reloading. *Am. J. Physiol. Regul. Integr. Comp. Physiol.* **295**, R1831–R1838, Epub 20080910, <https://doi.org/10.1152/ajpregu.90318.2008>
- 93 Butterfield, T.A., Best, T.M. and Merrick, M.A. (2006) The dual roles of neutrophils and macrophages in inflammation: a critical balance between tissue damage and repair. *J. Athl. Train.* **41**, 457–465
- 94 Cassatella, M.A. (1999) Neutrophil-derived proteins: selling cytokines by the pound. *Adv. Immunol.* **73**, 369–509, [https://doi.org/10.1016/S0065-2776\(08\)60791-9](https://doi.org/10.1016/S0065-2776(08)60791-9)
- 95 Nathan, C. (2006) Neutrophils and immunity: challenges and opportunities. *Nat. Rev. Immunol.* **6**, 173–182, <https://doi.org/10.1038/nri1785>
- 96 Pizza, F.X., Peterson, J.M., Baas, J.H. and Koh, T.J. (2005) Neutrophils contribute to muscle injury and impair its resolution after lengthening contractions in mice. *J. Physiol.* **562**, 899–913, Epub 20041118, <https://doi.org/10.1113/jphysiol.2004.073965>
- 97 Chazaud, B., Brigitte, M., Yacoub-Youssef, H., Arnold, L., Gherardi, R., Sonnet, C. et al. (2009) Dual and beneficial roles of macrophages during skeletal muscle regeneration. *Exerc. Sport Sci. Rev.* **37**, 18–22, <https://doi.org/10.1097/JES.0b013e318190ebdb>
- 98 Luo, G., Hershko, D.D., Robb, B.W., Wray, C.J. and Hasselgren, P.O. (2003) IL-1beta stimulates IL-6 production in cultured skeletal muscle cells through activation of MAP kinase signaling pathway and NF-kappa B. *Am. J. Physiol. Regul. Integr. Comp. Physiol.* **284**, R1249–R1254, <https://doi.org/10.1152/ajpregu.00490.2002>
- 99 Arnold, L., Henry, A., Poron, F., Baba-Amer, Y., van Rooijen, N., Plonquet, A. et al. (2007) Inflammatory monocytes recruited after skeletal muscle injury switch into antiinflammatory macrophages to support myogenesis. *J. Exp. Med.* **204**, 1057–1069, Epub 20070507, <https://doi.org/10.1084/jem.20070075>
- 100 Wynn, T.A. and Vannella, K.M. (2016) Macrophages in tissue repair, regeneration, and fibrosis. *Immunity* **44**, 450–462, <https://doi.org/10.1016/j.immuni.2016.02.015>
- 101 Castiglioni, A., Corna, G., Rigamonti, E., Basso, V., Vezzoli, M., Monno, A. et al. (2015) FOXP3+ T cells recruited to sites of sterile skeletal muscle injury regulate the fate of satellite cells and guide effective tissue regeneration. *PLoS ONE* **10**, e0128094, Epub 20150603, <https://doi.org/10.1371/journal.pone.0128094>
- 102 Ratnayake, D., Nguyen, P.D., Rossello, F.J., Wimmer, V.C., Tan, J.L., Galvis, L.A. et al. (2021) Macrophages provide a transient muscle stem cell niche via NAMPT secretion. *Nature* **591**, 281–287, Epub 20210210, <https://doi.org/10.1038/s41586-021-03199-7>
- 103 Rigamonti, E., Zordan, P., Sciorati, C., Rovere-Querini, P. and Brunelli, S. (2014) Macrophage plasticity in skeletal muscle repair. *Biomed. Res. Int.* **2014**, 560629, Epub 20140417, <https://doi.org/10.1155/2014/560629>
- 104 Dort, J., Orfi, Z., Fabre, P., Molina, T., Conte, T.C., Greffard, K. et al. (2021) Resolvin-D2 targets myogenic cells and improves muscle regeneration in Duchenne muscular dystrophy. *Nat. Commun.* **12**, 6264, Epub 20211029, <https://doi.org/10.1038/s41467-021-26516-0>
- 105 Lundberg, I.E., Fujimoto, M., Vencovsky, J., Aggarwal, R., Holmqvist, M., Christopher-Stine, L. et al. (2021) Idiopathic inflammatory myopathies. *Nat. Rev. Dis. Primers* **7**, 86, Epub 20211202, <https://doi.org/10.1038/s41572-021-00321-x>
- 106 Bohan, A. and Peter, J.B. (1975) Polymyositis and dermatomyositis (first of two parts). *N. Engl. J. Med.* **292**, 344–347, <https://doi.org/10.1056/NEJM197502132920706>
- 107 Malik, A., Hayat, G., Kalia, J.S. and Guzman, M.A. (2016) Idiopathic inflammatory myopathies: clinical approach and management. *Front. Neurol.* **7**, 64, Epub 20160520, <https://doi.org/10.3389/fneur.2016.00064>
- 108 Selva-O'Callaghan, A., Pinal-Fernandez, I., Trallero-Araguas, E., Milisenda, J.C., Grau-Junyent, J.M. and Mammen, A.L. (2018) Classification and management of adult inflammatory myopathies. *Lancet Neurol.* **17**, 816–828, [https://doi.org/10.1016/S1474-4422\(18\)30254-0](https://doi.org/10.1016/S1474-4422(18)30254-0)
- 109 Cardelli, C., Zanframundo, G., Cometi, L., Marcucci, E., Biglia, A., Cavagna, L. et al. (2022) Idiopathic inflammatory myopathies: one year in review 2021. *Clin. Exp. Rheumatol.* **40**, 199–209, Epub 20220119, <https://doi.org/10.55563/clinexp/rheumatol/vskjxi>
- 110 Furukawa, H., Oka, S., Kawasaki, A., Hidaka, M., Shimada, K., Kondo, Y. et al. (2020) Human leukocyte antigen in Japanese patients with idiopathic inflammatory myopathy. *Mod. Rheumatol.* **30**, 696–702, Epub 20190718, <https://doi.org/10.1080/14397595.2019.1637593>
- 111 Liu, W., Zhao, W.J. and Wu, Y.H. (2020) Study on the differentially expressed genes and signaling pathways in dermatomyositis using integrated bioinformatics method. *Medicine (Baltimore)*. **99**, e21863, <https://doi.org/10.1097/MD.00000000000021863>
- 112 Zhang, J., Khasanova, E. and Zhang, L. (2020) Bioinformatics analysis of gene expression profiles of inclusion body myositis. *Scand. J. Immunol.* **91**, e12887, Epub 20200510, <https://doi.org/10.1111/sji.12887>
- 113 Kinder, T.B., Heier, C.R., Tully, C.B., Van der Muelen, J.H., Hoffman, E.P., Nagaraju, K. et al. (2020) Muscle weakness in myositis: microRNA-mediated dystrophin reduction in a myositis mouse model and human muscle biopsies. *Arthritis Rheumatol.* **72**, 1170–1183, Epub 20200531, <https://doi.org/10.1002/art.41215>
- 114 Jiang, T., Huang, Y., Liu, H., Xu, Q., Gong, Y., Chen, Y. et al. (2020) Reduced miR-146a promotes REG3A expression and macrophage migration in polymyositis and dermatomyositis. *Front. Immunol.* **11**, 37, Epub 20200221, <https://doi.org/10.3389/fimmu.2020.00037>

- 115 Kamiya, M., Mizoguchi, F., Takamura, A., Kimura, N., Kawahata, K. and Kohsaka, H. (2020) A new in vitro model of polymyositis reveals CD8+ T cell invasion into muscle cells and its cytotoxic role. *Rheumatology (Oxford)*. **59**, 224–232, <https://doi.org/10.1093/rheumatology/kez248>
- 116 Tang, Q., Gheorghe, K.R., Zhang, X.M., Lindroos, E., Alexanderson, H., Wick, C. et al. (2020) Features of repeated muscle biopsies and phenotypes of monocytes in paired blood samples and clinical long-term response to treatment in patients with idiopathic inflammatory myopathy: a pilot study. *Clin. Exp. Rheumatol.* **38**, 42–49, Epub 20190522
- 117 Seto, N., Torres-Ruiz, J.J., Carmona-Rivera, C., Pinal-Fernandez, I., Pak, K., Purmalek, M.M. et al. (2020) Neutrophil dysregulation is pathogenic in idiopathic inflammatory myopathies. *JCI Insight* **5**, Epub 20200213, <https://doi.org/10.1172/jci.insight.134189>
- 118 Wanschitz, J.V., Dubourg, O., Lacene, E., Fischer, M.B., Hofberger, R., Budka, H. et al. (2013) Expression of myogenic regulatory factors and myo-endothelial remodeling in sporadic inclusion body myositis. *Neuromuscul. Disord.* **23**, 75–83, Epub 20121009, <https://doi.org/10.1016/j.nmd.2012.09.003>
- 119 Sugiura, T., Murakawa, Y., Nagai, A., Kondo, M. and Kobayashi, S. (1999) Fas and Fas ligand interaction induces apoptosis in inflammatory myopathies: CD4+ T cells cause muscle cell injury directly in polymyositis. *Arthritis Rheum.* **42**, 291–298, [https://doi.org/10.1002/1529-0131\(199902\)42:2%3c291::AID-ANR11%3e3.0.CO;2-1](https://doi.org/10.1002/1529-0131(199902)42:2%3c291::AID-ANR11%3e3.0.CO;2-1)
- 120 Cherin, P., Herson, S., Crevon, M.C., Hauw, J.J., Cervera, P., Galanaud, P. et al. (1996) Mechanisms of lysis by activated cytotoxic cells expressing perforin and granzyme-B genes and the protein TIA-1 in muscle biopsies of myositis. *J. Rheumatol.* **23**, 1135–1142
- 121 Engel, A.G. and Arahata, K. (1984) Monoclonal antibody analysis of mononuclear cells in myopathies. II: Phenotypes of autoinvasive cells in polymyositis and inclusion body myositis. *Ann. Neurol.* **16**, 209–215, <https://doi.org/10.1002/ana.410160207>
- 122 Kamiya, M., Mizoguchi, F., Kawahata, K., Wang, D., Nishibori, M., Day, J. et al. (2022) Targeting necroptosis in muscle fibers ameliorates inflammatory myopathies. *Nat. Commun.* **13**, 166, Epub 20220110, <https://doi.org/10.1038/s41467-021-27875-4>
- 123 Schmidt, J. (2018) Current classification and management of inflammatory myopathies. *J. Neuromuscul. Dis.* **5**, 109–129, <https://doi.org/10.3233/JND-180308>
- 124 Pinal-Fernandez, I., Casciola-Rosen, L.A., Christopher-Stine, L., Corse, A.M. and Mammen, A.L. (2015) The prevalence of individual histopathologic features varies according to autoantibody status in muscle biopsies from patients with dermatomyositis. *J. Rheumatol.* **42**, 1448–1454, <https://doi.org/10.3899/jrheum.141443>
- 125 Dalakas, M.C. (2002) Muscle biopsy findings in inflammatory myopathies. *Rheum. Dis. Clin. North Am.* **28**, 779–798, vi, [https://doi.org/10.1016/S0889-857X\(02\)00030-3](https://doi.org/10.1016/S0889-857X(02)00030-3)
- 126 Greenberg, S.A. (2010) Dermatomyositis and type 1 interferons. *Curr. Rheumatol. Rep.* **12**, 198–203, <https://doi.org/10.1007/s11926-010-0101-6>
- 127 Uruha, A., Nishikawa, A., Tsuburaya, R.S., Hamanaka, K., Kuwana, M., Watanabe, Y. et al. (2017) Sarcoplasmic MxA expression: a valuable marker of dermatomyositis. *Neurology* **88**, 493–500, Epub 20161230, <https://doi.org/10.1212/WNL.0000000000003568>
- 128 Baumann, M., Gumpold, C., Mueller-Felber, W., Schoser, B., Haberler, C., Loescher, W.N. et al. (2018) Pattern of myogenesis and vascular repair in early and advanced lesions of juvenile dermatomyositis. *Neuromuscul. Disord.* **28**, 973–985, Epub 20180919, <https://doi.org/10.1016/j.nmd.2018.09.002>
- 129 Gally, L., Fermon, C., Lessard, L., Weiss-Gayet, M., Viel, S., Streichenberger, N. et al. (2022) Involvement of type I interferon signaling in muscle stem cell proliferation during dermatomyositis. *Neurology* **98**, e2108–e2119, Epub 20220329, <https://doi.org/10.1212/WNL.0000000000200271>
- 130 Arouche-Delaperche, L., Allenbach, Y., Amelin, D., Preusse, C., Mouly, V., Mauhin, W. et al. (2017) Pathogenic role of anti-signal recognition protein and anti-3-Hydroxy-3-methylglutaryl-CoA reductase antibodies in necrotizing myopathies: myofiber atrophy and impairment of muscle regeneration in necrotizing autoimmune myopathies. *Ann. Neurol.* **81**, 538–548, <https://doi.org/10.1002/ana.24902>
- 131 Kamperman, R.G., van der Kooi, A.J., de Visser, M., Aronica, E. and Raaphorst, J. (2022) Pathophysiological mechanisms and treatment of dermatomyositis and immune mediated necrotizing myopathies: a focused review. *Int. J. Mol. Sci.* **23**, Epub 20220413, <https://doi.org/10.3390/ijms23084301>
- 132 Snedden, A.M., Kellett, K.A.B., Lilleker, J.B., Hooper, N.M. and Chinoy, H. (2022) The role of protein aggregation in the pathogenesis of inclusion body myositis. *Clin. Exp. Rheumatol.* **40**, 414–424, Epub 20220225, <https://doi.org/10.55563/clinexprheumatol/pp0os0>
- 133 Greenberg, S.A. (2019) Inclusion body myositis: clinical features and pathogenesis. *Nat. Rev. Rheumatol.* **15**, 257–272, <https://doi.org/10.1038/s41584-019-0186-x>
- 134 Karpati, G. and O’Ferrall, E.K. (2009) Sporadic inclusion body myositis: pathogenic considerations. *Ann. Neurol.* **65**, 7–11, <https://doi.org/10.1002/ana.21622>
- 135 Morosetti, R., Broccolini, A., Sancricca, C., Gliubizzi, C., Gidaro, T., Tonali, P.A. et al. (2010) Increased aging in primary muscle cultures of sporadic inclusion-body myositis. *Neurobiol. Aging* **31**, 1205–1214, Epub 20080926, <https://doi.org/10.1016/j.neurobiolaging.2008.08.011>
- 136 Jensen, K.Y., Nielsen, J.L., Schroder, H.D., Jacobsen, M., Boyle, E., Jorgensen, A.N. et al. (2022) Lack of muscle stem cell proliferation and myocellular hypertrophy in sIBM patients following blood-flow restricted resistance training. *Neuromuscul. Disord.* **32**, 493–502, Epub 20220426, <https://doi.org/10.1016/j.nmd.2022.04.006>
- 137 Crum-Cianflone, N.F. (2006) Infection and musculoskeletal conditions: infectious myositis. *Best Pract. Res. Clin. Rheumatol.* **20**, 1083–1097, <https://doi.org/10.1016/j.berh.2006.08.005>
- 138 Narayanappa, G. and Nandeesh, B.N. (2021) Infective myositis. *Brain Pathol.* **31**, e12950, <https://doi.org/10.1111/bpa.12950>
- 139 Rocheteau, P., Chatre, L., Briand, D., Mebarki, M., Jouvion, G., Bardon, J. et al. (2015) Sepsis induces long-term metabolic and mitochondrial muscle stem cell dysfunction amenable by mesenchymal stem cell therapy. *Nat Commun.* **6**, 10145, Epub 20151215, <https://doi.org/10.1038/ncomms10145>
- 140 Mankowski, R.T., Laitano, O., Darden, D., Kelly, L., Munley, J., Loftus, T.J. et al. (2022) Sepsis-induced myopathy and gut microbiome dysbiosis: mechanistic links and therapeutic targets. *Shock* **57**, 15–23, <https://doi.org/10.1097/SHK.0000000000001843>



- 141 Cho, D.S., Schmitt, R.E., Dasgupta, A., Ducharme, A.M. and Doles, J.D. (2020) Single-cell deconstruction of post-sepsis skeletal muscle and adipose tissue microenvironments. *J. Cachexia Sarcopenia Muscle* **11**, 1351–1363, Epub 20200708, <https://doi.org/10.1002/jcsm.12596>
- 142 Horn, C.V. and Master, S. (1968) Pyomyositis tropicans in Uganda. *East Afr. Med. J.* **45**, 463–471
- 143 Shittu, A., Deinhardt-Emmer, S., Vas Nunes, J., Niemann, S., Grobusch, M.P. and Schaumburg, F. (2020) Tropical pyomyositis: an update. *Trop. Med. Int. Health* **25**, 660–665, Epub 20200416, <https://doi.org/10.1111/tmi.13395>
- 144 Garcia, C., Hallin, M., Deplano, A., Denis, O., Sihuinchu, M., de Groot, R. et al. (2013) Staphylococcus aureus causing tropical pyomyositis, Amazon Basin, Peru. *Emerg. Infect. Dis.* **19**, 123–125, <https://doi.org/10.3201/eid1901.120819>
- 145 Chauhan, S., Jain, S., Varma, S. and Chauhan, S.S. (2004) Tropical pyomyositis (myositis tropicans): current perspective. *Postgrad. Med. J.* **80**, 267–270, <https://doi.org/10.1136/pgmj.2003.009274>
- 146 Chattopadhyay, B., Mukhopadhyay, M., Chatterjee, A., Biswas, P.K., Chatterjee, N. and Debnath, N.B. (2013) Tropical pyomyositis. *N. Am. J. Med. Sci.* **5**, 600–603, <https://doi.org/10.4103/1947-2714.120796>
- 147 Zitnan, R., Albrecht, E., Kalbe, C., Miersch, C., Revajova, V., Levkut, M. et al. (2019) Muscle characteristics in chicks challenged with Salmonella Enteritidis and the effect of preventive application of the probiotic Enterococcus faecium. *Poult. Sci.* **98**, 2014–2025, <https://doi.org/10.3382/ps/pey561>
- 148 Hougbedji, G.M., Bouchard, P. and Frenette, J. (2011) Mycobacterium ulcerans infections cause progressive muscle atrophy and dysfunction, and mycolactone impairs satellite cell proliferation. *Am. J. Physiol. Regul. Integr. Comp. Physiol.* **300**, R724–R732, Epub 20110105, <https://doi.org/10.1152/ajpregu.00393.2010>
- 149 Hougbedji, G.M., Cote, C.H., Small, P.L. and Frenette, J. (2009) Limited repair and structural damages displayed by skeletal muscles loaded with mycolactone. *Microbes Infect.* **11**, 238–244, Epub 20081216, <https://doi.org/10.1016/j.micinf.2008.11.016>
- 150 Crum-Cianflone, N.F. (2008) Bacterial, fungal, parasitic, and viral myositis. *Clin. Microbiol. Rev.* **21**, 473–494, <https://doi.org/10.1128/CMR.00001-08>
- 151 Jin, R.M., Warunek, J. and Wohlfert, E.A. (2018) Chronic infection stunts macrophage heterogeneity and disrupts immune-mediated myogenesis. *JCI Insight* **3**, Epub 20180920, <https://doi.org/10.1172/jci.insight.121549>
- 152 Jin, R.M., Blair, S.J., Warunek, J., Heffner, R.R., Blader, I.J. and Wohlfert, E.A. (2017) Regulatory T cells promote myositis and muscle damage in Toxoplasma gondii infection. *J. Immunol.* **198**, 352–362, Epub 20161128, <https://doi.org/10.4049/jimmunol.1600914>
- 153 Vieira, P.C., Waghabi, M.C., Beghini, D.G., Predes, D., Abreu, J.G., Mouly, V. et al. (2019) Toxoplasma gondii impairs myogenesis in vitro, with changes in myogenic regulatory factors, altered host cell proliferation and secretory profile. *Front Cell Infect. Microbiol.* **9**, 395, Epub 20191127, <https://doi.org/10.3389/fcimb.2019.00395>
- 154 Wu, Z., Nagano, I. and Takahashi, Y. (2013) Trichinella: what is going on during nurse cell formation? *Vet. Parasitol.* **194**, 155–159, Epub 20130205, <https://doi.org/10.1016/j.vetpar.2013.01.044>
- 155 Wu, Z., Matsuo, A., Nakada, T., Nagano, I. and Takahashi, Y. (2001) Different response of satellite cells in the kinetics of myogenic regulatory factors and ultrastructural pathology after Trichinella spiralis and T. pseudospiralis infection. *Parasitology* **123**, 85–94, <https://doi.org/10.1017/S0031182001007958>
- 156 Wu, Z., Nagano, I., Boonmars, T. and Takahashi, Y. (2005) A spectrum of functional genes mobilized after Trichinella spiralis infection in skeletal muscle. *Parasitology* **130**, 561–573, <https://doi.org/10.1017/S0031182004006912>
- 157 Wu, Z., Sofronic-Milosavljevic, L., Nagano, I. and Takahashi, Y. (2008) Trichinella spiralis: nurse cell formation with emphasis on analogy to muscle cell repair. *Parasit Vectors* **1**, 27, Epub 20080819, <https://doi.org/10.1186/1756-3305-1-27>
- 158 Wu, Z., Nagano, I., Boonmars, T. and Takahashi, Y. (2006) Involvement of the c-Ski oncoprotein in cell cycle arrest and transformation during nurse cell formation after Trichinella spiralis infection. *Int. J. Parasitol.* **36**, 1159–1166, Epub 20060621, <https://doi.org/10.1016/j.ijpara.2006.05.012>
- 159 Wu, Z., Nagano, I. and Takahashi, Y. (2008) Candidate genes responsible for common and different pathology of infected muscle tissues between Trichinella spiralis and T. pseudospiralis infection. *Parasitol. Int.* **57**, 368–378, Epub 20080409, <https://doi.org/10.1016/j.parint.2008.03.005>
- 160 Babal, P., Milcheva, R., Petkova, S., Janega, P. and Hurnikova, Z. (2011) Apoptosis as the adaptation mechanism in survival of Trichinella spiralis in the host. *Parasitol. Res.* **109**, 997–1002, Epub 20110405, <https://doi.org/10.1007/s00436-011-2343-2>
- 161 Hafez, E.N., El-Kholy, W.A.M.S. and El-Kholy, M.A.E.M. (2020) Amelioration of Myogenin, Bcl-2 expression and DNA damages in myocytes of Trichinella spiralis-infected mice after immunization with gamma radiation-attenuated larvae. *Int. J. Radiat. Res.* **18**, 699–706, <https://doi.org/10.52547/ijrr.18.4.699>
- 162 Ytterberg, S.R. (1996) Infectious agents associated with myopathies. *Curr. Opin. Rheumatol.* **8**, 507–513, <https://doi.org/10.1097/00002281-199611000-00003>
- 163 Crum-Cianflone, N.F. (2010) Nonbacterial myositis. *Curr. Infect. Dis. Rep.* **12**, 374–382, <https://doi.org/10.1007/s11908-010-0118-z>
- 164 Walsh, C.J., Batt, J., Herridge, M.S. and Dos Santos, C.C. (2014) Muscle wasting and early mobilization in acute respiratory distress syndrome. *Clin. Chest Med.* **35**, 811–826, Epub 20140930, <https://doi.org/10.1016/j.ccm.2014.08.016>
- 165 Gamboa, E.T., Eastwood, A.B., Hays, A.P., Maxwell, J. and Penn, A.S. (1979) Isolation of influenza virus from muscle in myoglobinuric polymyositis. *Neurology* **29**, 1323–1335, <https://doi.org/10.1212/WNL.29.10.1323>
- 166 Desdouts, M., Munier, S., Prevost, M.C., Jeannin, P., Butler-Browne, G., Ozden, S. et al. (2013) Productive infection of human skeletal muscle cells by pandemic and seasonal influenza A(H1N1) viruses. *PLoS ONE* **8**, e79628, Epub 20131105, <https://doi.org/10.1371/journal.pone.0079628>
- 167 Radigan, K.A., Nicholson, T.T., Welch, L.C., Chi, M., Amarelle, L., Angulo, M. et al. (2019) Influenza A virus infection induces muscle wasting via IL-6 regulation of the E3 ubiquitin ligase atrogin-1. *J. Immunol.* **202**, 484–493, Epub 20181207, <https://doi.org/10.4049/jimmunol.1701433>
- 168 Runyan, C.E., Welch, L.C., Lecuona, E., Shigemura, M., Amarelle, L., Abdala-Valencia, H. et al. (2020) Impaired phagocytic function in CX3CR1(+) tissue-resident skeletal muscle macrophages prevents muscle recovery after influenza A virus-induced pneumonia in old mice. *Aging Cell* **19**, e13180, Epub 20200728, <https://doi.org/10.1111/acel.13180>



- 169 Meacci, E., Pierucci, F. and Garcia-Gil, M. (2022) Skeletal muscle and COVID-19: the potential involvement of bioactive sphingolipids. *Biomedicines* **10**, Epub 20220504, <https://doi.org/10.3390/biomedicines10051068>
- 170 Ferrandi, P.J., Alway, S.E. and Mohamed, J.S. (2020) The interaction between SARS-CoV-2 and ACE2 may have consequences for skeletal muscle viral susceptibility and myopathies. *J. Appl. Physiol.* (1985) **129**, 864–867, Epub 20200716, <https://doi.org/10.1152/jappphysiol.00321.2020>
- 171 Filippone, C., Legros, V., Jeannin, P., Choumet, V., Butler-Browne, G., Zoladek, J. et al. (2020) Arboviruses and muscle disorders: from disease to cell biology. *Viruses* **12**, Epub 20200605, <https://doi.org/10.3390/v12060616>
- 172 Liddbury, B.A., Simeonovic, C., Maxwell, G.E., Marshall, I.D. and Hapel, A.J. (2000) Macrophage-induced muscle pathology results in morbidity and mortality for Ross River virus-infected mice. *J. Infect. Dis.* **181**, 27–34, <https://doi.org/10.1086/315164>
- 173 Herrero, L.J., Nelson, M., Srikiatkachorn, A., Gu, R., Anantapreecha, S., Fingerle-Rowson, G. et al. (2011) Critical role for macrophage migration inhibitory factor (MIF) in Ross River virus-induced arthritis and myositis. *Proc. Natl. Acad. Sci. U.S.A.* **108**, 12048–12053, Epub 20110705, <https://doi.org/10.1073/pnas.1101089108>
- 174 Gunn, B.M., Morrison, T.E., Whitmore, A.C., Blevins, L.K., Hueston, L., Fraser, R.J. et al. (2012) Mannose binding lectin is required for alphavirus-induced arthritis/myositis. *PLoS Pathog.* **8**, e1002586, Epub 20120322, <https://doi.org/10.1371/journal.ppat.1002586>
- 175 Ozden, S., Huerre, M., Riviere, J.P., Coffey, L.L., Afonso, P.V., Mouly, V. et al. (2007) Human muscle satellite cells as targets of Chikungunya virus infection. *PLoS ONE* **2**, e527, Epub 20070613, <https://doi.org/10.1371/journal.pone.0000527>
- 176 Hussain, K.M., Lee, R.C., Ng, M.M. and Chu, J.J. (2016) Establishment of a novel primary human skeletal myoblast cellular model for chikungunya virus infection and pathogenesis. *Sci. Rep.* **6**, 21406, Epub 20160219, <https://doi.org/10.1038/srep21406>
- 177 Legros, V., Jeannin, P., Burlaud-Gaillard, J., Chaze, T., Gianetto, Q.G., Butler-Browne, G. et al. (2020) Differentiation-dependent susceptibility of human muscle cells to Zika virus infection. *PLoS Negl. Trop. Dis.* **14**, e0008282, Epub 20200820, <https://doi.org/10.1371/journal.pntd.0008282>
- 178 Gavino-Leopoldino, D., Figueiredo, C.M., da Silva, M.O.L., Barcellos, L.G., Neris, R.L.S., Pinto, L.D.M. et al. (2021) Skeletal muscle is an early site of Zika virus replication and injury, which impairs myogenesis. *J. Virol.* **95**, e0090421, Epub 20210901, <https://doi.org/10.1128/JVI.00904-21>
- 179 Riederer, I., Mendes-da-Cruz, D.A., da Fonseca, G.C., Gonzalez, M.N., Brustolini, O., Rocha, C. et al. (2022) Zika virus disrupts gene expression in human myoblasts and myotubes: Relationship with susceptibility to infection. *PLoS Negl. Trop. Dis.* **16**, e0010166, Epub 20220216, <https://doi.org/10.1371/journal.pntd.0010166>
- 180 Dalakas, M.C. (2009) Toxic and drug-induced myopathies. *J. Neurol. Neurosurg. Psychiatry* **80**, 832–838, <https://doi.org/10.1136/jnnp.2008.168294>
- 181 Matthews, E., Brassington, R., Kuntzer, T., Jichi, F. and Manzur, A.Y. (2016) Corticosteroids for the treatment of Duchenne muscular dystrophy. *Cochrane Database Syst. Rev.* **CD003725**, Epub 20160505, <https://doi.org/10.1002/14651858.CD003725.pub4>
- 182 Liu, D., Ahmet, A., Ward, L., Krishnamoorthy, P., Mandelcorn, E.D., Leigh, R. et al. (2013) A practical guide to the monitoring and management of the complications of systemic corticosteroid therapy. *Allergy Asthma Clin. Immunol.* **9**, 30, Epub 20130815, <https://doi.org/10.1186/1710-1492-9-30>
- 183 Schakman, O., Kalista, S., Barbe, C., Loumaye, A. and Thissen, J.P. (2013) Glucocorticoid-induced skeletal muscle atrophy. *Int. J. Biochem. Cell Biol.* **45**, 2163–2172, Epub 20130624, <https://doi.org/10.1016/j.biocel.2013.05.036>
- 184 Dong, Y., Pan, J.S. and Zhang, L. (2013) Myostatin suppression of Akirin1 mediates glucocorticoid-induced satellite cell dysfunction. *PLoS ONE* **8**, e58554, Epub 20130313, <https://doi.org/10.1371/journal.pone.0058554>
- 185 Wang, X., Jia, Q., Xiao, J., Jiao, H. and Lin, H. (2015) Glucocorticoids retard skeletal muscle development and myoblast protein synthesis through a mechanistic target of rapamycin (mTOR)-signaling pathway in broilers (*Gallus gallus domesticus*). *Stress* **18**, 686–698, Epub 20150915, <https://doi.org/10.3109/10253890.2015.1083551>
- 186 Gokulakrishnan, G., Chang, X., Fleischmann, R. and Fiorotto, M.L. (2017) Precocious glucocorticoid exposure reduces skeletal muscle satellite cells in the fetal rat. *J. Endocrinol.* **232**, 561–572, Epub 20170117, <https://doi.org/10.1530/JOE-16-0372>
- 187 Li, X.S., Wang, B., Lin, H., Kihara, S., Sun, H. et al. (2020) TGF-beta1 plays a protective role in glucocorticoid-induced dystrophic calcification. *Bone* **136**, 115355, Epub 20200404, <https://doi.org/10.1016/j.bone.2020.115355>
- 188 McCroskery, S., Thomas, M., Maxwell, L., Sharma, M. and Kambadur, R. (2003) Myostatin negatively regulates satellite cell activation and self-renewal. *J. Cell Biol.* **162**, 1135–1147, Epub 20030908, <https://doi.org/10.1083/jcb.200207056>
- 189 Sun, L., Trausch-Azar, J.S., Muglia, L.J. and Schwartz, A.L. (2008) Glucocorticoids differentially regulate degradation of MyoD and Id1 by N-terminal ubiquitination to promote muscle protein catabolism. *Proc. Natl. Acad. Sci. U.S.A.* **105**, 3339–3344, Epub 20080222, <https://doi.org/10.1073/pnas.0800165105>
- 190 Siddiqui, S.H., Park, J., Kang, D., Khan, M. and Shim, K. (2021) Cortisol differentially affects the viability and myogenesis of mono- and co-cultured porcine gluteal muscles satellite cells and fibroblasts. *Tissue Cell* **73**, 101615, Epub 20210808, <https://doi.org/10.1016/j.tice.2021.101615>
- 191 Cerquone Perpetuini, A., Giuliani, G., Reggio, A., Cerretani, M., Santoriello, M., Stefanelli, R. et al. (2020) Janus effect of glucocorticoids on differentiation of muscle fibro/adipogenic progenitors. *Sci. Rep.* **10**, 5363, Epub 20200324, <https://doi.org/10.1038/s41598-020-62194-6>
- 192 Betters, J.L., Long, J.H., Howe, K.S., Braith, R.W., Soltow, Q.A., Lira, V.A. et al. (2008) Nitric oxide reverses prednisolone-induced inactivation of muscle satellite cells. *Muscle Nerve* **37**, 203–209, <https://doi.org/10.1002/mus.20915>
- 193 Quattrocchi, M., Barefield, D.Y., Warner, J.L., Vo, A.H., Hadhazy, M., Earley, J.U. et al. (2017) Intermittent glucocorticoid steroid dosing enhances muscle repair without eliciting muscle atrophy. *J. Clin. Invest.* **127**, 2418–2432, Epub 20170508, <https://doi.org/10.1172/JCI91445>
- 194 Di Stasi, S.L., MacLeod, T.D., Winters, J.D. and Binder-Macleod, S.A. (2010) Effects of statins on skeletal muscle: a perspective for physical therapists. *Phys. Ther.* **90**, 1530–1542, Epub 20100805, <https://doi.org/10.2522/ptj.20090251>
- 195 Hanai, J., Cao, P., Tanksale, P., Imamura, S., Koshimizu, E., Zhao, J. et al. (2007) The muscle-specific ubiquitin ligase atrogin-1/MAFbx mediates statin-induced muscle toxicity. *J. Clin. Invest.* **117**, 3940–3951, <https://doi.org/10.1172/JCI32741>
- 196 Phillips, P.S. and Haas, R.H. (2008) Statin myopathy as a metabolic muscle disease. *Expert Rev. Cardiovasc. Ther.* **6**, 971–978, <https://doi.org/10.1586/14779072.6.7.971>

- 197 Rebalka, I.A., Cao, A.W., Raleigh, M.J., Henriksbo, B.D., Coleman, S.K., Schertzer, J.D. et al. (2017) Statin therapy negatively impacts skeletal muscle regeneration and cutaneous wound repair in type 1 diabetic mice. *Front. Physiol.* **8**, 1088, Epub 20171219, <https://doi.org/10.3389/fphys.2017.01088>
- 198 Grunwald, S.A., Popp, O., Haafke, S., Jedraszczak, N., Grieben, U., Saar, K. et al. (2020) Statin-induced myopathic changes in primary human muscle cells and reversal by a prostaglandin F2 alpha analogue. *Sci. Rep.* **10**, 2158, Epub 20200207, <https://doi.org/10.1038/s41598-020-58668-2>
- 199 Ho, A.T.V., Palla, A.R., Blake, M.R., Yucel, N.D., Wang, Y.X., Magnusson, K.E.G. et al. (2017) Prostaglandin E2 is essential for efficacious skeletal muscle stem-cell function, augmenting regeneration and strength. *Proc. Natl. Acad. Sci. U.S.A.* **114**, 6675–6684, Epub 20170612, <https://doi.org/10.1073/pnas.1705420114>
- 200 Ogura, T., Tanaka, Y., Nakata, T., Namikawa, T., Kataoka, H. and Ohtsubo, Y. (2007) Simvastatin reduces insulin-like growth factor-1 signaling in differentiating C2C12 mouse myoblast cells in an HMG-CoA reductase inhibition-independent manner. *J. Toxicol. Sci.* **32**, 57–67, <https://doi.org/10.2131/jts.32.57>
- 201 Sanvee, G.M., Bouitbir, J. and Krahenbuhl, S. (2021) C2C12 myoblasts are more sensitive to the toxic effects of simvastatin than myotubes and show impaired proliferation and myotube formation. *Biochem. Pharmacol.* **190**, 114649, Epub 20210607, <https://doi.org/10.1016/j.bcp.2021.114649>
- 202 Fu, C.N., Song, J.W., Song, Z.P., Wang, Q.W., Bai, W.W., Guo, T. et al. (2021) Excessive expression of miR-1a by statin causes skeletal injury through targeting mitogen-activated protein kinase kinase kinase 1. *Aging (Albany NY)* **13**, 11470–11490, Epub 20210416, <https://doi.org/10.18632/aging.202839>
- 203 Justiniano, M., Dold, S. and Espinoza, L.R. (2007) Rapid onset of muscle weakness (rhabdomyolysis) associated with the combined use of simvastatin and colchicine. *J. Clin. Rheumatol.* **13**, 266–268, <https://doi.org/10.1097/RHU.0b013e318156d977>
- 204 Ching, J.K., Ju, J.S., Pittman, S.K., Margeta, M. and Weihl, C.C. (2013) Increased autophagy accelerates colchicine-induced muscle toxicity. *Autophagy* **9**, 2115–2125, <https://doi.org/10.4161/auto.26150>
- 205 Buch, B.T., Halling, J.F., Ringholm, S., Gudiksen, A., Kjobsted, R., Olsen, M.A. et al. (2020) Colchicine treatment impairs skeletal muscle mitochondrial function and insulin sensitivity in an age-specific manner. *FASEB J.* **34**, 8653–8670, Epub 20200505, <https://doi.org/10.1096/fj.201903113RR>
- 206 Bischoff, R. and Holtzer, H. (1968) The effect of mitotic inhibitors on myogenesis in vitro. *J. Cell Biol.* **36**, 111–127, <https://doi.org/10.1083/jcb.36.1.111>
- 207 Warren, R.H. (1968) The effect of colchicine on myogenesis in vivo in *Rana pipiens* and *Rhodnius prolixus* (Hemiptera). *J. Cell Biol.* **39**, 544–555, <https://doi.org/10.1083/jcb.39.3.544>
- 208 Pietsch, P. (1961) The effects of colchicine on regeneration of mouse skeletal muscle. *Anat. Rec.* **139**, 167–172, <https://doi.org/10.1002/ar.1091390208>
- 209 Suzuki, T., Nakagawa, M., Yoshikawa, A., Sasagawa, N., Yoshimori, T., Ohsumi, Y. et al. (2002) The first molecular evidence that autophagy relates rimmed vacuole formation in chloroquine myopathy. *J. Biochem.* **131**, 647–651, <https://doi.org/10.1093/oxfordjournals.jbchem.a003147>
- 210 Xu, J., Cui, X., Li, J., Koutakis, P., Pipinos, I., Tzeng, E. et al. (2018) Chloroquine improves the response to ischemic muscle injury and increases HMGB1 after arterial ligation. *J. Vasc. Surg.* **67**, 910–921, Epub 20170301, <https://doi.org/10.1016/j.jvs.2017.01.021>
- 211 Tang, A.H. and Rando, T.A. (2014) Induction of autophagy supports the bioenergetic demands of quiescent muscle stem cell activation. *EMBO J.* **33**, 2782–2797, Epub 20141014, <https://doi.org/10.15252/embj.201488278>
- 212 Madden, L., Juhas, M., Kraus, W.E., Truskey, G.A. and Bursac, N. (2015) Bioengineered human myobundles mimic clinical responses of skeletal muscle to drugs. *Elife* **4**, e04885, Epub 20150109, <https://doi.org/10.7554/eLife.04885>
- 213 Pavlidou, T., Marinkovic, M., Rosina, M., Fuoco, C., Vumbaca, S., Gargioli, C. et al. (2019) Metformin delays satellite cell activation and maintains quiescence. *Stem Cells Int.* **2019**, 5980465, Epub 20190424, <https://doi.org/10.1155/2019/5980465>
- 214 Schwier, N.C., Cornelio, C.K. and Boylan, P.M. (2022) A systematic review of the drug-drug interaction between statins and colchicine: patient characteristics, etiologies, and clinical management strategies. *Pharmacotherapy* **42**, 320–333, Epub 20220225, <https://doi.org/10.1002/phar.2674>
- 215 Goldie, F.C., Brogan, A. and Boyle, J.G. (2016) Ciprofloxacin and statin interaction: a cautionary tale of rhabdomyolysis. *BMJ Case Rep.* **2016**, Epub 20160728, <https://doi.org/10.1136/bcr-2016-216048>
- 216 Pedersen, B.K. and Saltin, B. (2015) Exercise as medicine - evidence for prescribing exercise as therapy in 26 different chronic diseases. *Scand. J. Med. Sci. Sports* **25**, 1–72, <https://doi.org/10.1111/sms.12581>
- 217 Menon, M.K., Houchen, L., Singh, S.J., Morgan, M.D., Bradding, P. and Steiner, M.C. (2012) Inflammatory and satellite cells in the quadriceps of patients with COPD and response to resistance training. *Chest* **142**, 1134–1142, <https://doi.org/10.1378/chest.11-2144>
- 218 Steensberg, A., van Hall, G., Osada, T., Sacchetti, M., Saltin, B. and Klarlund Pedersen, B. (2000) Production of interleukin-6 in contracting human skeletal muscles can account for the exercise-induced increase in plasma interleukin-6. *J. Physiol.* **529**, 237–242, <https://doi.org/10.1111/j.1469-7793.2000.00237.x>
- 219 Nitert, M.D., Dayeh, T., Volkov, P., Elgzryi, T., Hall, E., Nilsson, E. et al. (2012) Impact of an exercise intervention on DNA methylation in skeletal muscle from first-degree relatives of patients with type 2 diabetes. *Diabetes* **61**, 3322–3332, Epub 20121001, <https://doi.org/10.2337/db11-1653>
- 220 Barrès, R., Yan, J., Egan, B., Trebak, J.T., Rasmussen, M., Fritz, T. et al. (2012) Acute exercise remodels promoter methylation in human skeletal muscle. *Cell Metab.* **15**, 405–411, <https://doi.org/10.1016/j.cmet.2012.01.001>
- 221 Farup, J., Rahbek, S.K., Riis, S., Vendelbo, M.H., Paoli, F. and Vissing, K. (2014) Influence of exercise contraction mode and protein supplementation on human skeletal muscle satellite cell content and muscle fiber growth. *J. Appl. Physiol.* (1985) **117**, 898–909, Epub 20140807, <https://doi.org/10.1152/jappphysiol.00261.2014>
- 222 Hawke, T.J. (2005) Muscle stem cells and exercise training. *Exerc. Sport Sci. Rev.* **33**, 63–68, <https://doi.org/10.1097/00003677-200504000-00002>
- 223 Kadi, F., Eriksson, A., Holmner, S., Butler-Browne, G.S. and Thornell, L.E. (1999) Cellular adaptation of the trapezius muscle in strength-trained athletes. *Histochem. Cell Biol.* **111**, 189–195, <https://doi.org/10.1007/s004180050348>

- 224 Lundberg, I.E., Alexanderson, H., Arnardottir, S. and Borg, K. (2003) Exercise is beneficial for patients with myositis. Both pharmaceuticals and physical activity should be included in the therapy of chronic rheumatic muscle inflammation. *Lakartidningen* **100**, 2754–2759, Det är bra för myositpatienter att träna. Både farmaka och fysisk aktivitet bör ingå i behandlingen vid kronisk reumatisk muskelinflammation
- 225 Yamada, T., Ashida, Y., Tamai, K., Kimura, I., Yamauchi, N., Naito, A. et al. (2022) Improved skeletal muscle fatigue resistance in experimental autoimmune myositis mice following high-intensity interval training. *Arthritis Res. Ther.* **24**, 156, Epub 20220627, <https://doi.org/10.1186/s13075-022-02846-2>
- 226 Nader, G.A. and Lundberg, I.E. (2009) Exercise as an anti-inflammatory intervention to combat inflammatory diseases of muscle. *Curr. Opin. Rheumatol.* **21**, 599–603, <https://doi.org/10.1097/BOR.0b013e3283319d53>
- 227 Rosenson, R.S., Taylor, B.A. and Kurland, I.J. (2021) Exercise training improves muscle performance and quality of life in patients with statin muscle symptoms. *J. Am. Coll. Cardiol.* **78**, 2038–2041, <https://doi.org/10.1016/j.jacc.2021.09.023>
- 228 Qureshi, A.A., Reis, J.C., Papisian, C.J., Morrison, D.C. and Qureshi, N. (2010) Tocotrienols inhibit lipopolysaccharide-induced pro-inflammatory cytokines in macrophages of female mice. *Lipids Health Dis.* **9**, 143, Epub 20101216, <https://doi.org/10.1186/1476-511X-9-143>
- 229 Serbinova, E., Kagan, V., Han, D. and Packer, L. (1991) Free radical recycling and intramembrane mobility in the antioxidant properties of alpha-tocopherol and alpha-tocotrienol. *Free Radic. Biol. Med.* **10**, 263–275, [https://doi.org/10.1016/0891-5849\(91\)90033-Y](https://doi.org/10.1016/0891-5849(91)90033-Y)
- 230 Aragno, M., Mastrocola, R., Catalano, M.G., Brignardello, E., Danni, O. and Boccuzzi, G. (2004) Oxidative stress impairs skeletal muscle repair in diabetic rats. *Diabetes* **53**, 1082–1088, <https://doi.org/10.2337/diabetes.53.4.1082>
- 231 Rossman, M.J., Groot, H.J., Reese, V., Zhao, J., Amann, M. and Richardson, R.S. (2013) Oxidative stress and COPD: the effect of oral antioxidants on skeletal muscle fatigue. *Med. Sci. Sports Exerc.* **45**, 1235–1243, <https://doi.org/10.1249/MSS.0b013e3182846d7e>
- 232 Passey, S.L., Hansen, M.J., Bozinovski, S., McDonald, C.F., Holland, A.E. and Vlahos, R. (2016) Emerging therapies for the treatment of skeletal muscle wasting in chronic obstructive pulmonary disease. *Pharmacol. Ther.* **166**, 56–70, Epub 20160629, <https://doi.org/10.1016/j.pharmthera.2016.06.013>
- 233 Rossman, M.J., Trinity, J.D., Garten, R.S., Ives, S.J., Conklin, J.D., Barrett-O’Keefe, Z. et al. (2015) Oral antioxidants improve leg blood flow during exercise in patients with chronic obstructive pulmonary disease. *Am. J. Physiol. Heart Circ. Physiol.* **309**, H977–H985, Epub 20150717, <https://doi.org/10.1152/ajpheart.00184.2015>
- 234 Stratos, I., Behrendt, A.K., Anselm, C., Gonzalez, A., Mittlmeier, T. and Vollmar, B. (2022) Inhibition of TNF- $\alpha$  restores muscle force, inhibits inflammation, and reduces apoptosis of traumatized skeletal muscles. *Cells* **11**, Epub 20220803, <https://doi.org/10.3390/cells11152397>
- 235 Rennard, S.I., Fogarty, C., Kelsen, S., Long, W., Ramsdell, J., Allison, J. et al. (2007) The safety and efficacy of infliximab in moderate to severe chronic obstructive pulmonary disease. *Am. J. Respir. Crit. Care Med.* **175**, 926–934, Epub 20070208, <https://doi.org/10.1164/rccm.200607-9950C>
- 236 Schiftenbauer, A., Garg, M., Castro, C., Pokrovnichka, A., Joe, G., Shrader, J. et al. (2018) A randomized, double-blind, placebo-controlled trial of infliximab in refractory polymyositis and dermatomyositis. *Semin. Arthritis Rheum.* **47**, 858–864, Epub 20171016, <https://doi.org/10.1016/j.semarthrit.2017.10.010>
- 237 Chung, E.S., Packer, M., Lo, K.H., Fasanmade, A.A. and Willerson, J.T. (2003) Randomized, double-blind, placebo-controlled, pilot trial of infliximab, a chimeric monoclonal antibody to tumor necrosis factor- $\alpha$ , in patients with moderate-to-severe heart failure: results of the anti-TNF Therapy Against Congestive Heart Failure (ATTACH) trial. *Circulation* **107**, 3133–3140, Epub 20030609, <https://doi.org/10.1161/01.CIR.0000077913.60364.D2>
- 238 Aaron, S.D., Vandemheen, K.L., Maltais, F., Field, S.K., Sin, D.D., Bourbeau, J. et al. (2013) TNF $\alpha$  antagonists for acute exacerbations of COPD: a randomised double-blind controlled trial. *Thorax* **68**, 142–148, Epub 20121117, <https://doi.org/10.1136/thoraxjnl-2012-202432>
- 239 Albayda, J. and Christopher-Stine, L. (2012) Novel approaches in the treatment of myositis and myopathies. *Ther. Adv. Musculoskelet Dis.* **4**, 369–377, <https://doi.org/10.1177/1759720X12447705>
- 240 Barnes, P.J. (2007) Unexpected failure of anti-tumor necrosis factor therapy in chronic obstructive pulmonary disease. *Am. J. Respir. Crit. Care Med.* **175**, 866–867, <https://doi.org/10.1164/rccm.200702-253ED>
- 241 Guo, P., Li, R., Piao, T.H., Wang, C.L., Wu, X.L. and Cai, H.Y. (2022) Pathological mechanism and targeted drugs of COPD. *Int. J. Chron. Obstruct. Pulmon. Dis.* **17**, 1565–1575, Epub 20220712, <https://doi.org/10.2147/COPD.S366126>
- 242 Tichy, E.D., Ma, N., Sidibe, D., Loro, E., Kocan, J., Chen, D.Z. et al. (2021) Persistent NF- $\kappa$ B activation in muscle stem cells induces proliferation-independent telomere shortening. *Cell Rep.* **35**, 109098, <https://doi.org/10.1016/j.celrep.2021.109098>
- 243 Hammers, D.W., Sleeper, M.M., Forbes, S.C., Coker, C.C., Jirousek, M.R., Zimmer, M. et al. (2016) Disease-modifying effects of orally bioavailable NF- $\kappa$ B inhibitors in dystrophin-deficient muscle. *JCI Insight* **1**, e90341, Epub 20161222, <https://doi.org/10.1172/jci.insight.90341>
- 244 Hsiao, H.M., Thatcher, T.H., Colas, R.A., Serhan, C.N., Phipps, R.P. and Sime, P.J. (2015) Resolvin D1 reduces emphysema and chronic inflammation. *Am. J. Pathol.* **185**, 3189–3201, Epub 20151024, <https://doi.org/10.1016/j.ajpath.2015.08.008>
- 245 Insuela, D.B.R., Ferrero, M.R., Coutinho, D.S., Martins, M.A. and Carvalho, V.F. (2020) Could arachidonic acid-derived pro-resolving mediators be a new therapeutic strategy for asthma therapy? *Front. Immunol.* **11**, 580598, Epub 20201209, <https://doi.org/10.3389/fimmu.2020.580598>
- 246 Baron, F., Ribbens, C., Kaye, O., Fillet, G., Malaise, M. and Beguin, Y. (2000) Effective treatment of Jo-1-associated polymyositis with T-cell-depleted autologous peripheral blood stem cell transplantation. *Br. J. Haematol.* **110**, 339–342, <https://doi.org/10.1046/j.1365-2141.2000.02191.x>
- 247 Holzer, U., van Royen-Kerkhof, A., van der Torre, P., Kuemmerle-Deschner, J., Well, C., Handgretinger, R. et al. (2010) Successful autologous stem cell transplantation in two patients with juvenile dermatomyositis. *Scand. J. Rheumatol.* **39**, 88–92, <https://doi.org/10.3109/03009740903096622>
- 248 Henes, J.C., Heinzlmann, F., Wacker, A., Seelig, H.P., Klein, R., Bornemann, A. et al. (2009) Antisignal recognition particle-positive polymyositis successfully treated with myeloablative autologous stem cell transplantation. *Ann. Rheum. Dis.* **68**, 447–448, <https://doi.org/10.1136/ard.2008.094755>
- 249 Wang, D., Zhang, H., Cao, M., Tang, Y., Liang, J., Feng, X. et al. (2011) Efficacy of allogeneic mesenchymal stem cell transplantation in patients with drug-resistant polymyositis and dermatomyositis. *Ann. Rheum. Dis.* **70**, 1285–1288, <https://doi.org/10.1136/ard.2010.141804>
